# Supplementary material for: Designing dual-atom cobalt catalysts anchored on amino-functionalized MOFs for efficient CO2photoreduction
Source: Royal Society of Chemistry journal article supplement (doi:10.1039/d3gc01461d), 2023-01-01
Supplement: d3gc01461d1.pdf [file d3gc01461d1.pdf]

## Supporting information

### **Designing Dual-Atom Cobalt Catalysts Anchored on Amino-Functionalized MOFs for Efficient CO<sub>2</sub> Photoreduction**

Meng-ting Ming<sup>†</sup>, Yu-chen Wang<sup>†</sup>, Wei-xue Tao, Wen-jie Shi\*, Di-chang Zhong\*,  
Tong-bu Lu\*

MOE International Joint Laboratory of Materials Microstructure, Institute for New Energy Materials & Low Carbon Technologies, School of Material Science & Engineering, Tianjin University of Technology, Tianjin 300384, China

#### **Corresponding Author**

\* Wen-jie Shi (wjshi@email.tjut.edu.cn)

\* Di-chang Zhong (dczhong@email.tjut.edu.cn)

\* Tongbu Lu (lutongbu@tjut.edu.cn)

## 1. Materials and Instruments

All chemicals were purchased from commercial ways and used without further purification. The water used was prepared by using a Milli-Q ultrapure water purification system. Powder X-ray diffraction (PXRD) tests were conducted on a SmartLab 9 KW X-ray diffractometer (Rigaku, Japan). Scanning electron microscopy (SEM) images were collected on a scanning electron microscope Quanta250FEG (FEI, America). High-resolution transmission electron microscopy (HRTEM) images and element mapping were collected on a Talos F200X (FEI, America). Fourier transform infrared (FT-IR) spectra were analyzed on a PerkinElmer Frontier Mid-IR FT-IR spectrometer using KBr pellets. UV-Vis DRS was acquired on a UV-3600 spectrophotometer (Shimadzu, Japan) with Ba<sub>2</sub>SO<sub>4</sub> as the background. X-ray photoelectron spectroscopy (XPS) were performed on an ESCALAB250Xi X-ray spectrometer (Thermo Scientific, America) and the test data were calibrated versus C 1s binding energy (284.6 eV). The contents of Co and Zr were quantified by inductively coupled plasma-mass spectrometer (ICP-MS, iCAP RQ, Germany). CO<sub>2</sub> adsorption measurement was carried out using a multi-station specific surface micropore and vapor analyzer (BELSORP-Mas, MicrotracBEL, Japan) at 298 K. In-situ FTIR spectra were recorded on Nicolet Is50 FTIR (Thermo Scientific, America). An F-4600 fluorescence spectrometer (Hitachi, Japan) was employed to demonstrate the quenching mode of the excited photosensitive part of the catalyst. <sup>1</sup>H NMR spectra were obtained on a Bruker AVANCE III HD spectrometer at 400 MHz, and referenced to the proton resonance resulting from DMSO-d<sub>6</sub> (δ 2.50). Amounts of CO evolution were detected by Shimadzu GC-2014 gas chromatography equipped with a thermal conductivity detector (TCD) and a flame conductivity detector (FID). Isotope labeling experiment was performed in <sup>13</sup>CO<sub>2</sub> atmosphere, and the products were analyzed by gas chromatography- mass spectrometer (GC-MS, Agilent 7980B). Mott-Schottky, Transient photocurrent response (TPR) and electrochemical impedance (EIS) measurements were operated on a CHI760E workstation (Chenhua Instrument, Shanghai, China) equipped with a standard three-electrode system, with catalyst-coated Fluorine-doped tin oxide transparent conductive film glass (FTO) as working electrode, Pt plate as counter electrode, and Ag/AgCl as reference electrode. 2 mg catalyst was dispersed in a mixture of 960 μL ethanol and 40 μL Nafion, and then 100 μL suspension was added dropwise onto the surface of a FTO plate with an area of 1×1 cm and dried naturally to obtain the working electrode. 0.5 M Na<sub>2</sub>SO<sub>4</sub> solution

was used as electrolyte. Mott-Schottky plots were measured at frequencies of 500, 1000, and 1500 Hz, respectively. Photo responsive signals were recorded under chopped light with a bias potential of + 0.6 V. EIS tests were performed with a bias potential of + 0.6 V.

## 2. Synthesis and Characterization of Ligand and Complexes

### 2.1 Synthesis of methyl 3,5-diformyl-4-hydroxybenzoate (P-1) and 3,5-diformyl-4-hydroxybenzoic acid (P-2)

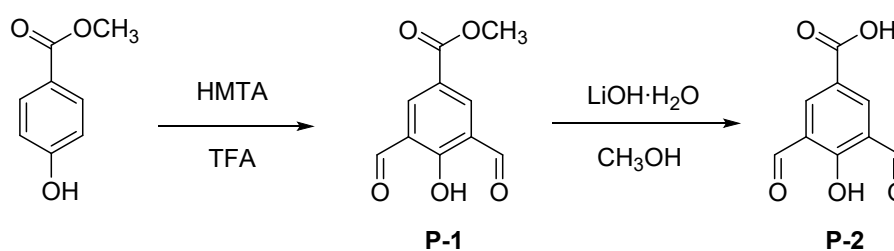

Scheme S1. Synthesis of P-1 and P-2.<sup>1</sup>

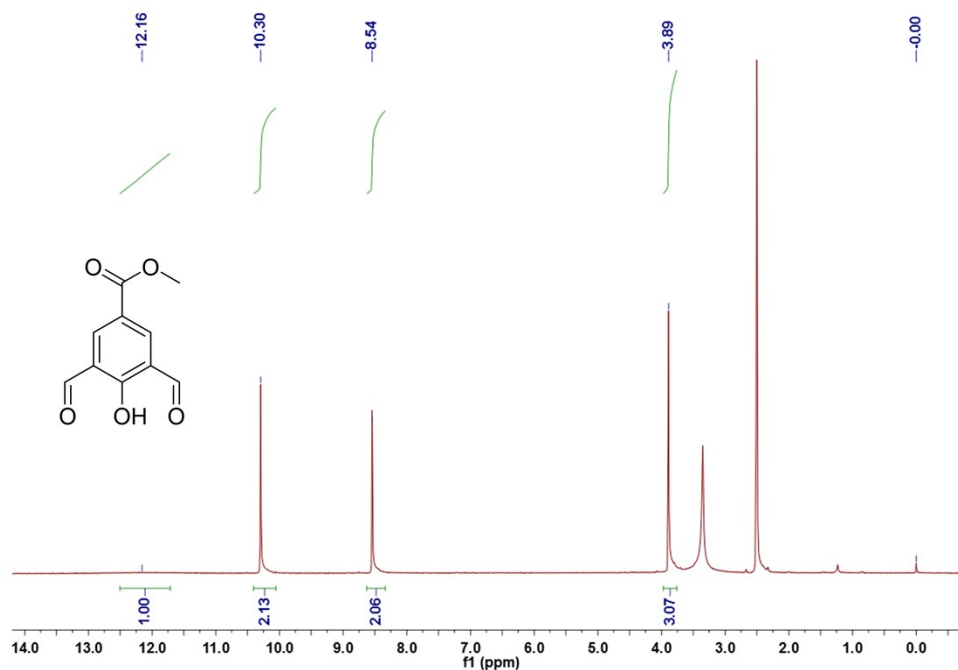

Figure S1. <sup>1</sup>H NMR spectrum of P-1. [400 MHz, DMSO-d<sub>6</sub>, δ 12.16 (s, 1H), 10.30 (s, 2H), 8.54 (s, 2H), 3.07 (s, 3H)].

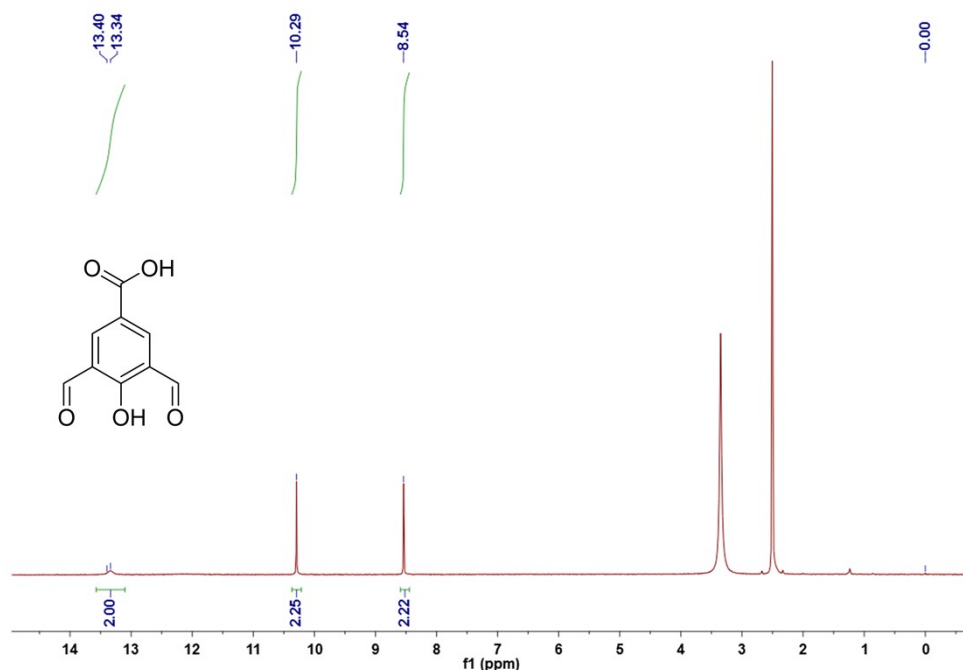

**Figure S2.**  $^1\text{H}$  NMR spectrum of P-2. [400 MHz,  $\text{DMSO-d}_6$ ,  $\delta$  10.34-10.40 (d, 2H), 10.29 (s, 2H), 8.54 (s, 2H)].

## 2.2 Synthesis of L1 and L4

L1 was synthesized in accordance with previously reported literatures.<sup>2,3</sup> L4 was synthesized through a Schiff-based reaction. P-2 was dissolved in ethanol, to which 1 eq 2, 2-dimethyl-1, 3-malonediamine was added. The mixed solution was stirred at room temperature for 24 h. Finally, the orange powder was collected by centrifugation and dried.

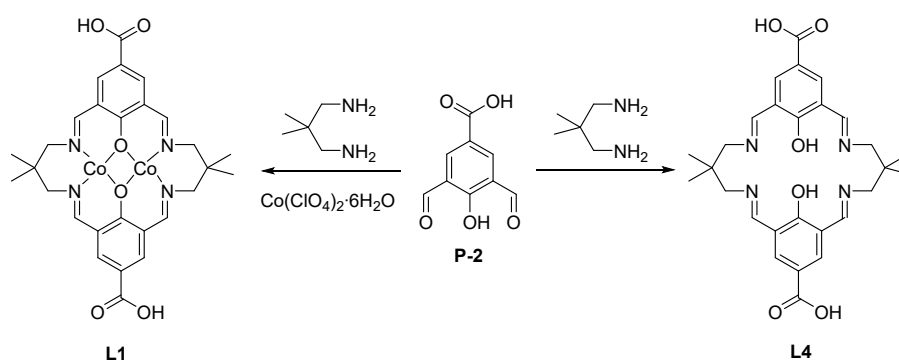

**Scheme S2.** Synthesis of L1 and L4.

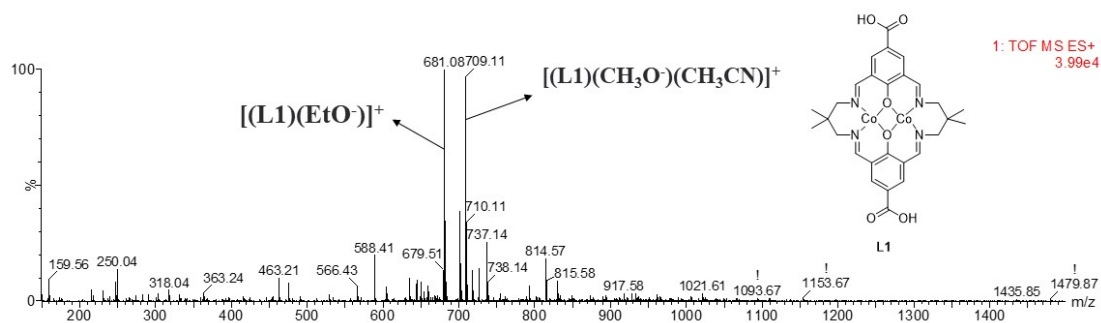

**Figure S3.** Mass of L1 in CH<sub>3</sub>OH solution,  $m/z = 681.08$   $[\text{L1}(\text{EtO})]^+$ ,  $m/z = 709.11$   $[\text{L1}(\text{CH}_3\text{O})(\text{CH}_3\text{CN})]^+$ .

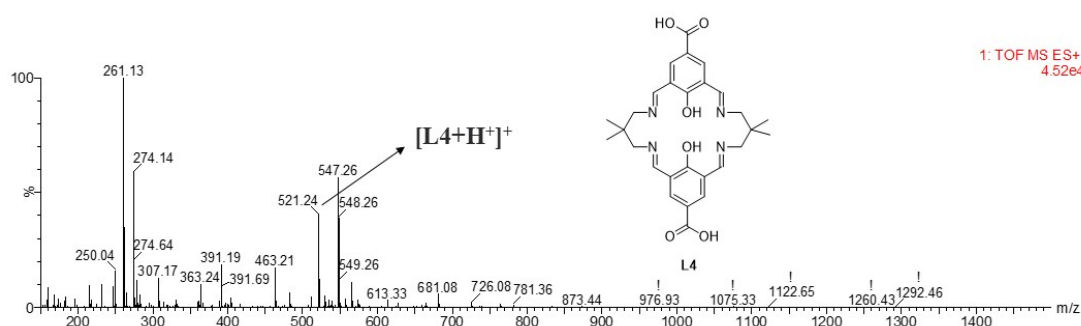

**Figure S4.** Mass spectrum of L4 in CH<sub>3</sub>CN solution,  $m/z = 521.24$   $[\text{L4}+\text{H}^+]^+$ .

### 3. Synthesis and Characterization of Co<sub>2</sub>-MOF(-NH<sub>2</sub>), Co-MOF(-NH<sub>2</sub>), L-MOF(-NH<sub>2</sub>) and Co<sub>2</sub>-MOF

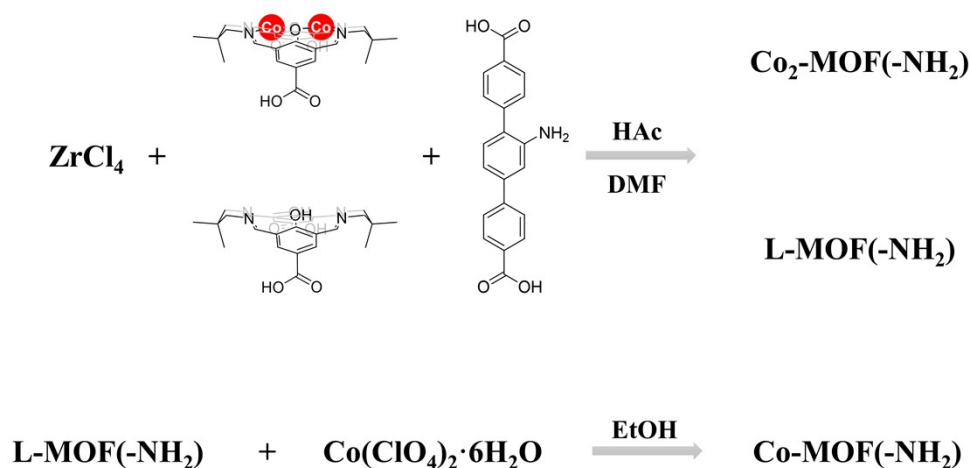

**Scheme S3.** Synthesis of Co<sub>2</sub>-MOF(-NH<sub>2</sub>), Co-MOF(-NH<sub>2</sub>) and L-MOF(-NH<sub>2</sub>).

The photocatalyst Co<sub>2</sub>-MOF(-NH<sub>2</sub>) required for this work was synthesized by a solvothermal reaction with slight modification to a previously reported procedure.<sup>4, 5</sup>

5.2 mg  $\text{ZrCl}_4$  (0.0222 mmol), 6.6 mg L1 (0.0074 mmol), 12.3 mg 2'-amino-[1,1':4',1''-terphenyl]-4,4''-dicarboxylic acid (L2, 0.0370 mmol), 600  $\mu\text{L}$  acetic acid were dissolved in 6 mL DMF by ultrasound. Then the mixture was transferred into a 15 mL vial, which was sealed and heated at 120  $^\circ\text{C}$  for 24 h. After cooling to room temperature, the light yellow powder was collected by centrifugation, washed with DMF and acetonitrile for 3 times. In addition, by changing the ratio of L1 and L2, we have synthesized a series of  $\text{Co}_2\text{-MOFs(-NH}_2\text{)}$ . The dosage of the chemicals was listed below:

**Table S1.** The dosage of the chemicals during the synthesis of  $\text{Co}_2\text{-MOFs(-NH}_2\text{)}$  with different ratios of L1 and L2.

| Samples                                   | L1:L2 | m ( $\text{ZrCl}_4$ ) (mg) | m (L1) (mg) | m (L2) (mg) |
|-------------------------------------------|-------|----------------------------|-------------|-------------|
| $\text{Co}_2\text{-MOF(-NH}_2\text{)-1}$  | 1:1   |                            | 19.9        | 7.4         |
| $\text{Co}_2\text{-MOF(-NH}_2\text{)-2}$  | 1:2   |                            | 13.3        | 9.9         |
| $\text{Co}_2\text{-MOF(-NH}_2\text{)}$    | 1:5   | 5.2                        | 6.6         | 12.3        |
| $\text{Co}_2\text{-MOF(-NH}_2\text{)-10}$ | 1:10  |                            | 3.6         | 13.4        |
| $\text{Co}_2\text{-MOF(-NH}_2\text{)-20}$ | 1:20  |                            | 1.9         | 14.1        |

The preparation of L-MOF(-NH<sub>2</sub>) follows the same method as  $\text{Co}_2\text{-MOF(-NH}_2\text{)}$  except substitute 3.8 mg L4 (0.0074 mmol) for 6.6 mg L1.

The mononuclear Co-MOF(-NH<sub>2</sub>) was prepared with the reaction of  $\text{Co}(\text{ClO}_4)_2 \cdot 6\text{H}_2\text{O}$  and L-MOF(-NH<sub>2</sub>): 20 mg L-MOF(-NH<sub>2</sub>) was added to a mixed solution containing 2 mg  $\text{Co}(\text{ClO}_4)_2 \cdot 6\text{H}_2\text{O}$  and 5 mL methanol and then stirred at room temperature for 24 h. Finally, the yellow powder was collected by centrifugation and dried.

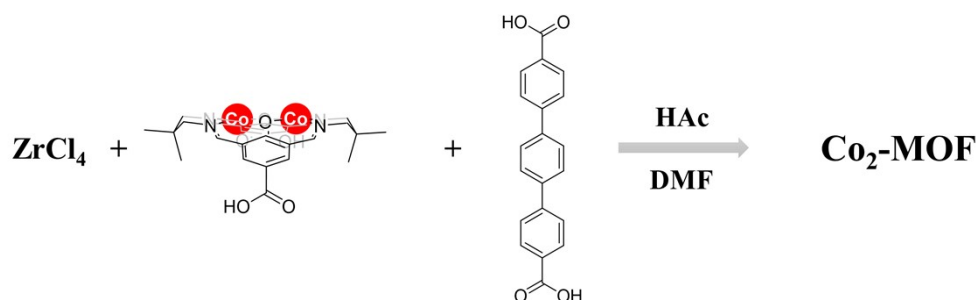

**Scheme S4.** Synthesis of Co<sub>2</sub>-MOF.

The preparation of Co<sub>2</sub>-MOF follows the same method as Co<sub>2</sub>-MOF(-NH<sub>2</sub>) except substitute 11.8 mg [1,1':4,1''-terphenyl]-4,4''-dicarboxylic acid (L3, 0.0370 mmol) for 12.3 mg L2.

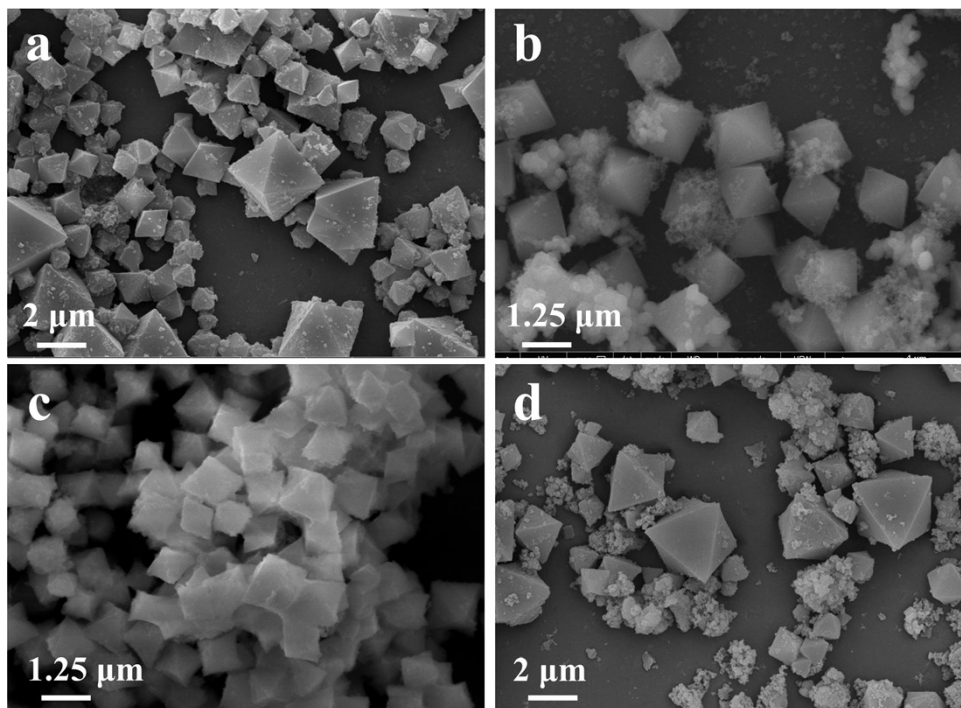

**Figure S5.** SEM images of Co<sub>2</sub>-MOF(-NH<sub>2</sub>), Co-MOF(-NH<sub>2</sub>), L-MOF(-NH<sub>2</sub>) and Co<sub>2</sub>-MOF.

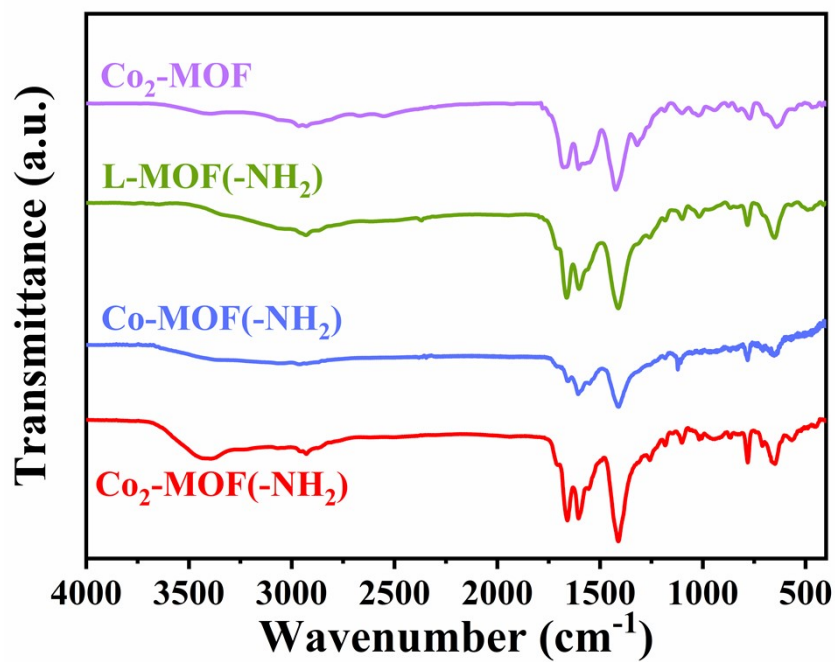

**Figure S6.** IR spectrum of Co<sub>2</sub>-MOF(-NH<sub>2</sub>) (red), Co-MOF(-NH<sub>2</sub>) (blue), L-MOF(-NH<sub>2</sub>) (green) and Co<sub>2</sub>-MOF (purple).

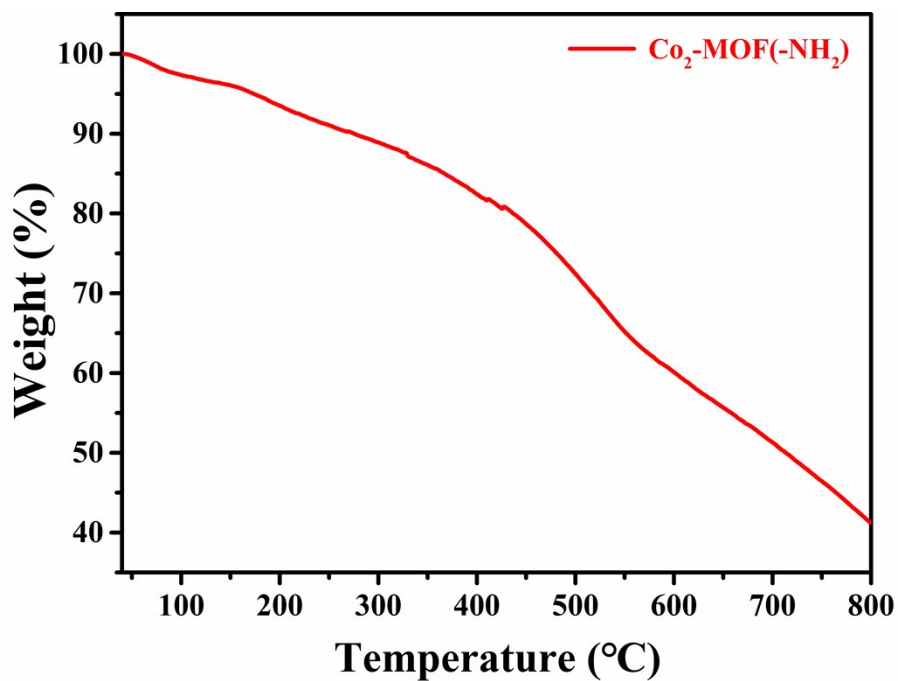

**Figure S7.** TG curves of Co<sub>2</sub>-MOF(-NH<sub>2</sub>).



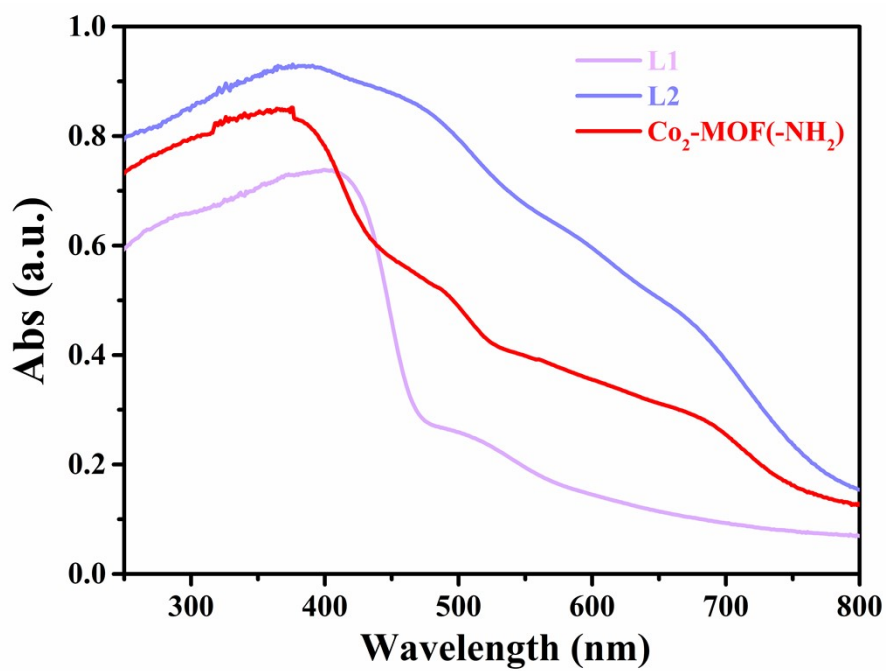

Figure S8. UV-Vis DRS of L1, L2 and Co<sub>2</sub>-MOF(-NH<sub>2</sub>).

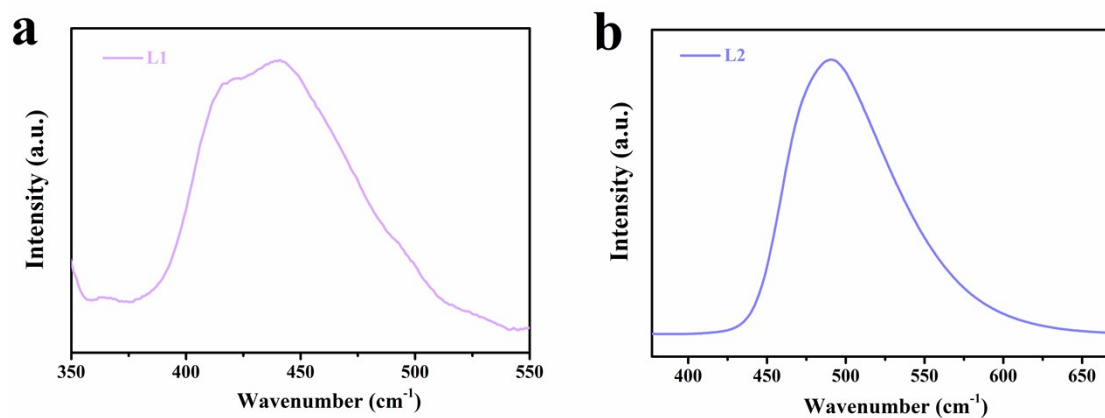

Figure S9. The PL spectra of L1 and L2.

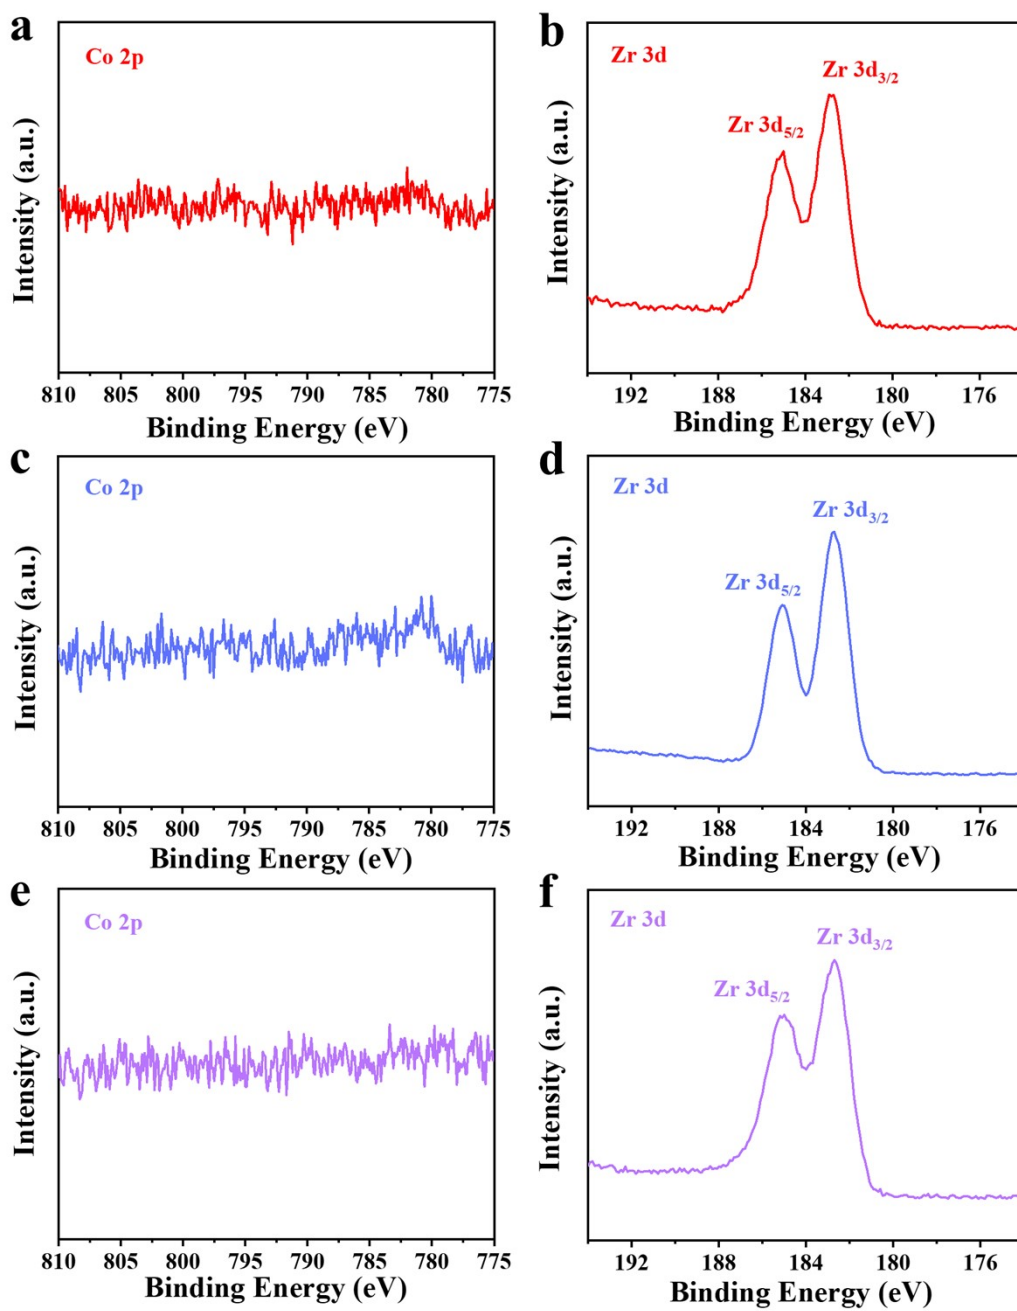

**Figure S10.** X-ray photoelectron spectroscopy (XPS) of Co 2p and Zr 3d for Co<sub>2</sub>-MOF(-NH<sub>2</sub>) (a, b), Co-MOF(-NH<sub>2</sub>) (c, d) and Co<sub>2</sub>-MOF (e, f).

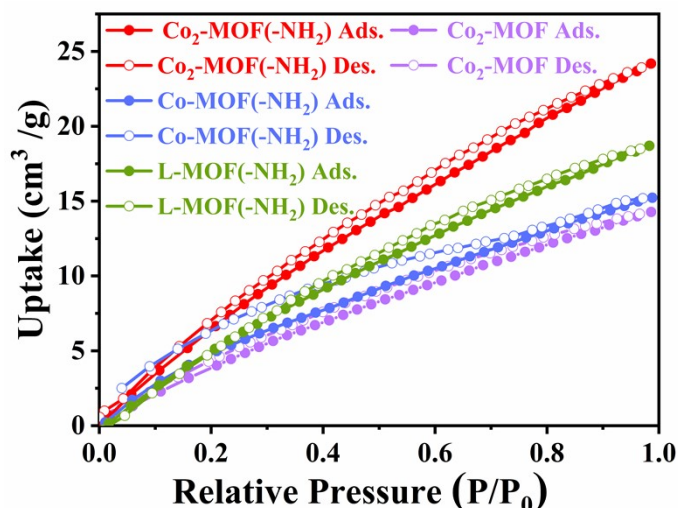

**Figure S11.** CO<sub>2</sub> adsorption/desorption isotherms of Co<sub>2</sub>-MOF(-NH<sub>2</sub>) (red), Co-MOF(-NH<sub>2</sub>) (blue), L-MOF(-NH<sub>2</sub>) (green) and Co<sub>2</sub>-MOF (purple) at 298 K.

#### 4. Photo-catalytic CO<sub>2</sub> reduction experiment

The photocatalytic CO<sub>2</sub> reduction reaction was conducted in a 17.5 mL special quartz tube with a rubber hose. 1 mg Co<sub>2</sub>-MOF(-NH<sub>2</sub>), Co-MOF(-NH<sub>2</sub>), L-MOF(-NH<sub>2</sub>) or Co<sub>2</sub>-MOF as catalyst was dispersed in a 5 mL mixed solution of CH<sub>3</sub>CN and H<sub>2</sub>O (v/v =4/1) containing 0.025 M BIH as sacrificial reductant. The reaction system was degassed with Ar to remove O<sub>2</sub> and other gases, and pumped with CO<sub>2</sub> for 30 minutes until saturated. Then a 300 W Xe lamp with full spectrum was used as the light source. After irradiation for 10 h at room temperature, the gas products were detected by gas chromatograph (GC-2014, Shimadzu, Japanese). Each photocatalytic reaction is repeated at least 3 times to ensure data reliability.

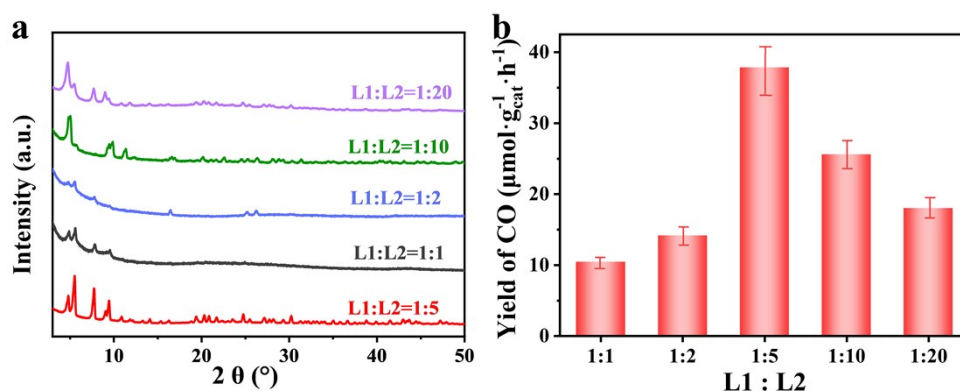

**Figure S12.** (a) PXRD patterns and (b) CO production of Co<sub>2</sub>-MOF(-NH<sub>2</sub>) with ratio of L1 and L2 from 1:1 to 1:20.

**Table S2.** The ICP analysis of MOFs

| Samples                                                  | $\omega_{\text{Co}}$ (%) | $\omega_{\text{Zr}}$ (%) | $n_{\text{Co}}: n_{\text{Zr}}$ |
|----------------------------------------------------------|--------------------------|--------------------------|--------------------------------|
| Co <sub>2</sub> -MOF(-NH <sub>2</sub> ) (L1: L2 = 1:20)  | 0.79                     | 30.56                    | 1: 25.0                        |
| Co <sub>2</sub> -MOF(-NH <sub>2</sub> ) (L1: L2 = 1:10)  | 1.05                     | 19.69                    | 1: 12.3                        |
| Co <sub>2</sub> -MOF(-NH <sub>2</sub> ) (L1: L2 = 1: 5)  | 1.55                     | 12.32                    | 1: 9.1                         |
| Co <sub>2</sub> -MOF(-NH <sub>2</sub> ) (L1: L2 = 1: 2)  | 2.80                     | 19.42                    | 1: 4.5                         |
| Co <sub>2</sub> -MOF(-NH <sub>2</sub> ) (L1: L2 = 1: 1)  | 3.19                     | 11.16                    | 1: 2.3                         |
| Co-MOF(-NH <sub>2</sub> )                                | 0.88                     | 18.02                    | 1:13.2                         |
| Co <sub>2</sub> -MOF                                     | 1.24                     | 20.52                    | 1: 10.7                        |
| Co <sub>2</sub> -MOF(-NH <sub>2</sub> ) (after reaction) | 1.30                     | 22.84                    | 1: 11.3                        |

**Table S3.** The ICP analysis of Co in Co-MOF(-NH<sub>2</sub>).

| Samples (inventory ratio)                                                                                           | $\omega_{\text{Co}}$ (%) |
|---------------------------------------------------------------------------------------------------------------------|--------------------------|
| Co-MOF(-NH <sub>2</sub> ) (L-MOF(-NH <sub>2</sub> ): Co(ClO <sub>4</sub> ) <sub>2</sub> ·6H <sub>2</sub> O = 10:1)  | 0.88                     |
| Co-MOF(-NH <sub>2</sub> ) (L-MOF(-NH <sub>2</sub> ): Co(ClO <sub>4</sub> ) <sub>2</sub> ·6H <sub>2</sub> O = 5:1)   | 0.92                     |
| Co-MOF(-NH <sub>2</sub> ) (L-MOF(-NH <sub>2</sub> ): Co(ClO <sub>4</sub> ) <sub>2</sub> ·6H <sub>2</sub> O = 2.5:1) | 0.92                     |

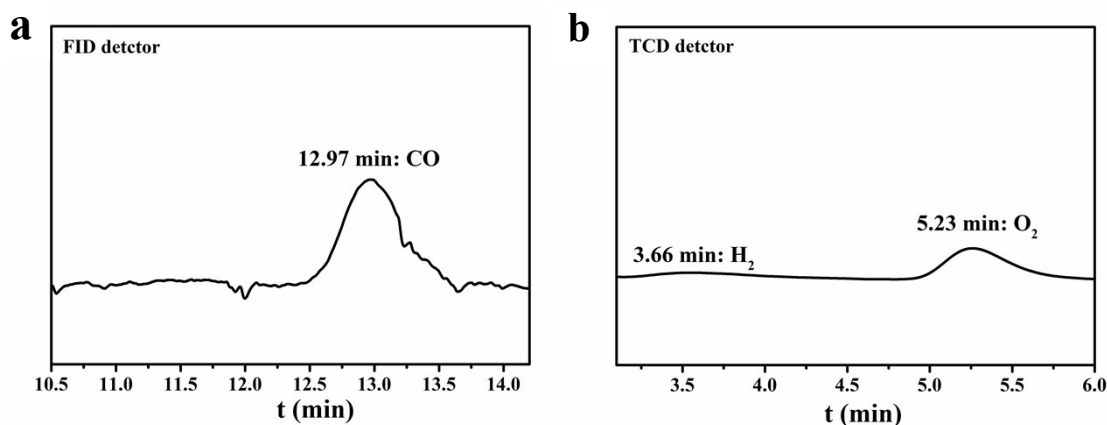

**Figure S13.** Gas chromatography (GC) of the Co<sub>2</sub>-MOF (-NH<sub>2</sub>) photocatalysis CO<sub>2</sub> reduction.

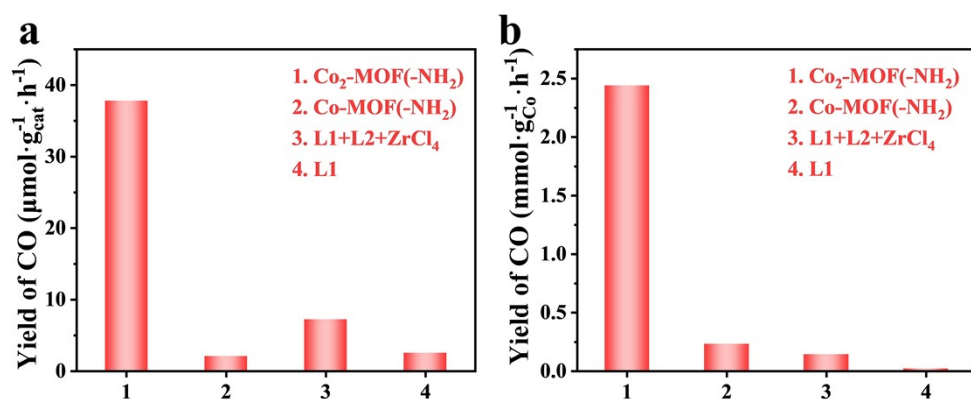

**Figure S14.** CO production vs. cat. (a) and Co content (b) of Co<sub>2</sub>-MOF(-NH<sub>2</sub>), Co-MOF(-NH<sub>2</sub>), the mixed sample (L1, L2 and ZrCl<sub>4</sub>) and L1 (in homogeneous phase).

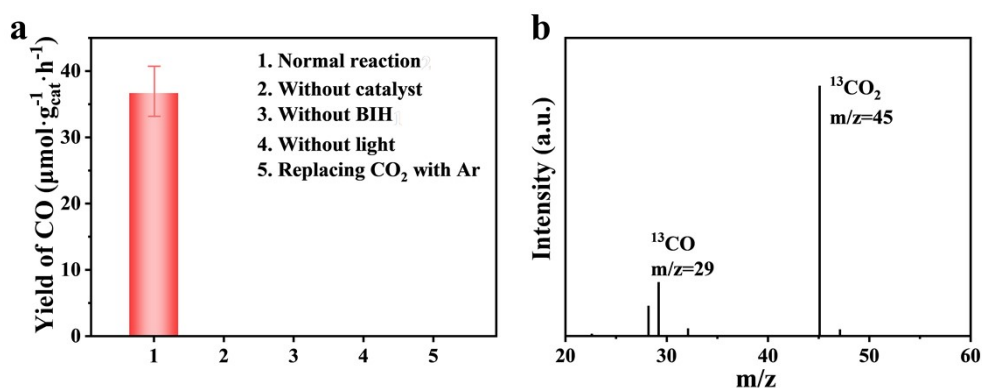

**Figure S15.** (a) CO production of Co<sub>2</sub>-MOF(-NH<sub>2</sub>) compared the corresponding blank experiments; (b) mass spectrum of produced <sup>13</sup>CO via isotope <sup>13</sup>CO<sub>2</sub> reduction under visible light.

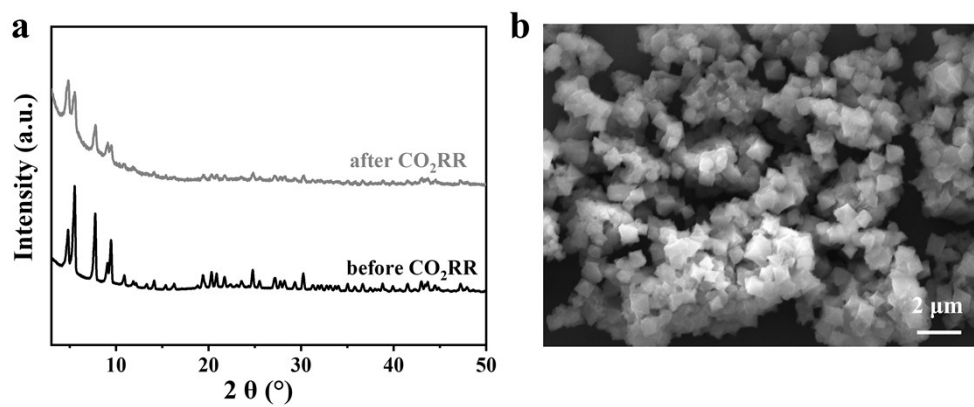

**Figure S16.** PXRD patterns and SEM images of Co<sub>2</sub>-MOF(-NH<sub>2</sub>) after CO<sub>2</sub>RR.

**Table S4.** A comparison of photocatalytic CO<sub>2</sub> reduction activities of recently reported MOF-based catalysts without additional photosensitizer.

| Catalyst                                | Reaction agent                           | Light source                               | Major product     | Yield ( $\mu\text{mol}\cdot\text{g}^{-1}\cdot\text{h}^{-1}$ )      | Ref.                       |
|-----------------------------------------|------------------------------------------|--------------------------------------------|-------------------|--------------------------------------------------------------------|----------------------------|
| Co <sub>2</sub> -MOF(-NH <sub>2</sub> ) | CH <sub>3</sub> CN/H <sub>2</sub> O, BIH | 300 W Xe lamp, 780 nm > $\lambda$ > 320 nm | CO                | 37.8                                                               | <b>This work</b>           |
| PCN-222                                 | CH <sub>3</sub> CN, TEOA                 | 300 W Xe lamp, 800 nm > $\lambda$ > 420 nm | HCOO <sup>-</sup> | 60                                                                 | Jiang et al. <sup>6</sup>  |
| NNU-28                                  | CH <sub>3</sub> CN, TEOA                 | 300 W Xe lamp, 800 nm > $\lambda$ > 420 nm | HCOO <sup>-</sup> | 52.8                                                               | Chen et al. <sup>7</sup>   |
| MOF-525-Zn                              | CH <sub>3</sub> CN, TEOA                 | 300 W Xe lamp, 800 nm > $\lambda$ > 420 nm | CO                | 200.6                                                              | Ye et al. <sup>8</sup>     |
| Re-MOF-NH <sub>2</sub>                  | TEA                                      | 300 W Xe lamp, 700 nm > $\lambda$ > 400 nm | CO                | 1.5                                                                | Ryu et al. <sup>9</sup>    |
| Ag <sub>2</sub> Re <sub>3</sub> -MOF    | CH <sub>3</sub> CN, TEA                  | 300 W Xe lamp, 700 nm > $\lambda$ > 400 nm | CO                | 7 (TON)                                                            | Yaghi et al. <sup>10</sup> |
| Zr-SDCA-NH <sub>2</sub>                 | CH <sub>3</sub> CN, TEOA                 | 300 W Xe lamp, 800 nm > $\lambda$ > 420 nm | HCOO <sup>-</sup> | 96.2 ( $\mu\text{mol h}^{-1}$<br>$\text{mmol}_{\text{MOF}}^{-1}$ ) | Sun et al. <sup>11</sup>   |
| Zn-MOF                                  | CH <sub>3</sub> CN, MeOH,<br>TEOA        | 120 W Xe lamp, 800 nm > $\lambda$ > 420 nm | CO                | 117.8 (TON)                                                        | Ye et al. <sup>12</sup>    |

|                                             |                                      |                                                      |                   |            |                              |
|---------------------------------------------|--------------------------------------|------------------------------------------------------|-------------------|------------|------------------------------|
| Zn <sub>2</sub> GeO <sub>4</sub> /Mg-MOF-74 | CH <sub>3</sub> CN, H <sub>2</sub> O | 300 W Xe lamp, 1100 nm > λ > 200 nm                  | CO                | 1.44       | Zhao et al. <sup>13</sup>    |
| UiO-68(Zr)-F                                | Acetone, TEOA                        | 300 W Xe lamp, 780 > λ > 400 nm                      | CO                | 2.1        | Wei et al. <sup>14</sup>     |
| UiO-68(Zr)-NH <sub>2</sub>                  |                                      |                                                      |                   | 2.2        |                              |
| UiO-68(Zr)-CH <sub>3</sub>                  |                                      |                                                      |                   | 10.9       |                              |
| UiO-68(Zr)-OCH <sub>3</sub>                 |                                      |                                                      |                   | 19.7       |                              |
| AUBM-4                                      | CH <sub>3</sub> CN, TEOA             | 150 W Xe lamp, 800 nm > λ > 420 nm                   | HCOO <sup>-</sup> | 366        | Mahmoud et al. <sup>15</sup> |
| mPT-Cu/Re                                   | DMA, H <sub>2</sub> O, BIH           | 13.9 W Solid state plasma light, 700 nm > λ > 350 nm | CO                | 1328 (TON) | Lin et al. <sup>16</sup>     |



## 5. Photophysical and Electrochemical Data

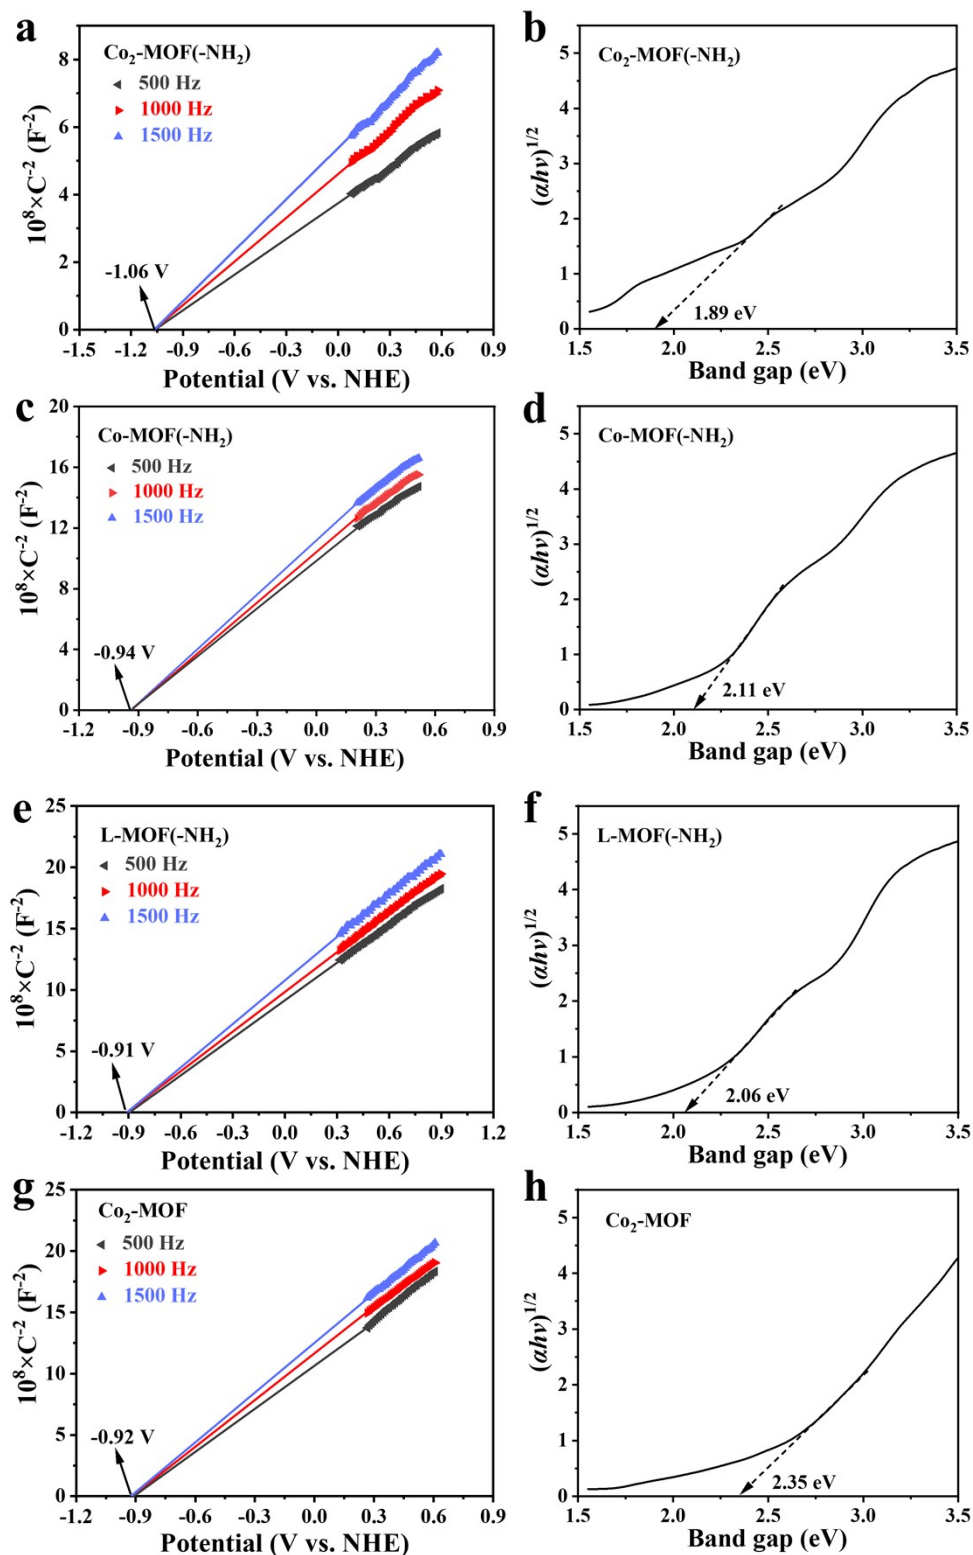

**Figure S17.** Mott-Schottky plots in 0.5 M  $\text{Na}_2\text{SO}_4$  aqueous solution and Tauc plots of  $(\alpha h\nu)^{1/2}$  vs. photon energy of (a)  $\text{Co}_2\text{-MOF(-NH}_2\text{)}$ , (b)  $\text{Co-MOF(-NH}_2\text{)}$ , (c)  $\text{L-MOF(-NH}_2\text{)}$  and (d)  $\text{Co}_2\text{-MOF}$ .

## 6. Mechanism Investigations

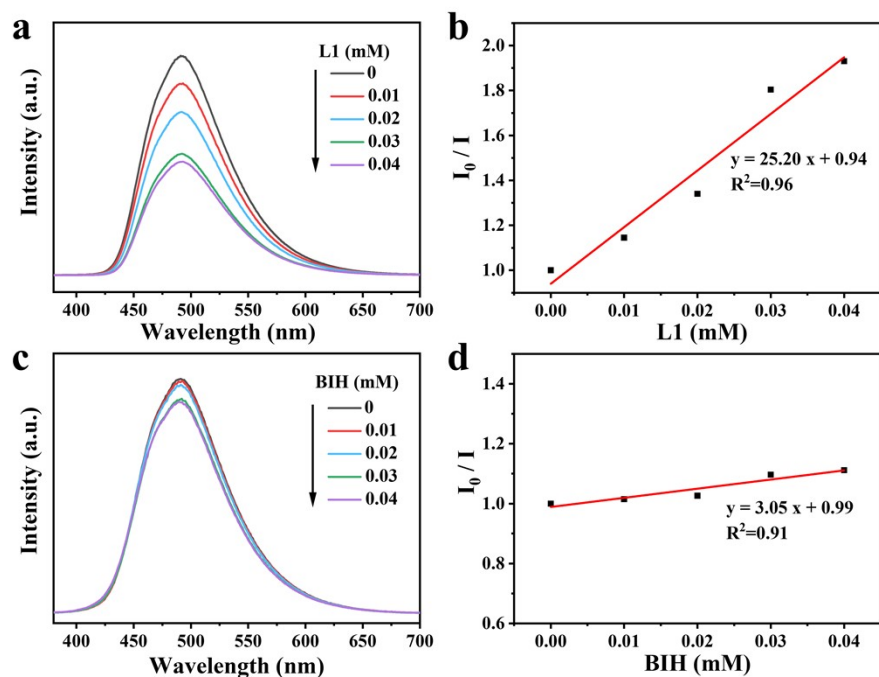

**Figure S18.** Fluorescence spectra of a  $\text{CH}_3\text{CN}/\text{H}_2\text{O}$  ( $v:v = 4:1$ ) solution containing 0.4 mM L2 in the presence of 0-0.04 mM L1 (a) or BIH (c), respectively. Linear plots of fluorescent intensity ratio in the absence ( $I_0$ ) and presence ( $I$ ) of L1 (or BIH) versus the concentrations of L1 (b) or BIH (d).

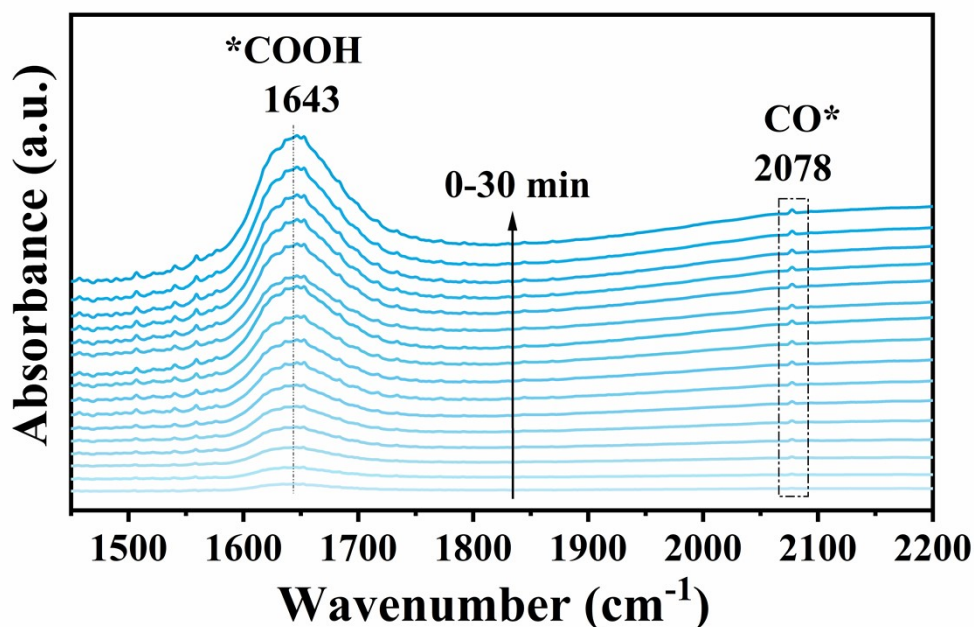

**Figure S19.** In situ FTIR spectra of Co-MOF(- $\text{NH}_2$ ).

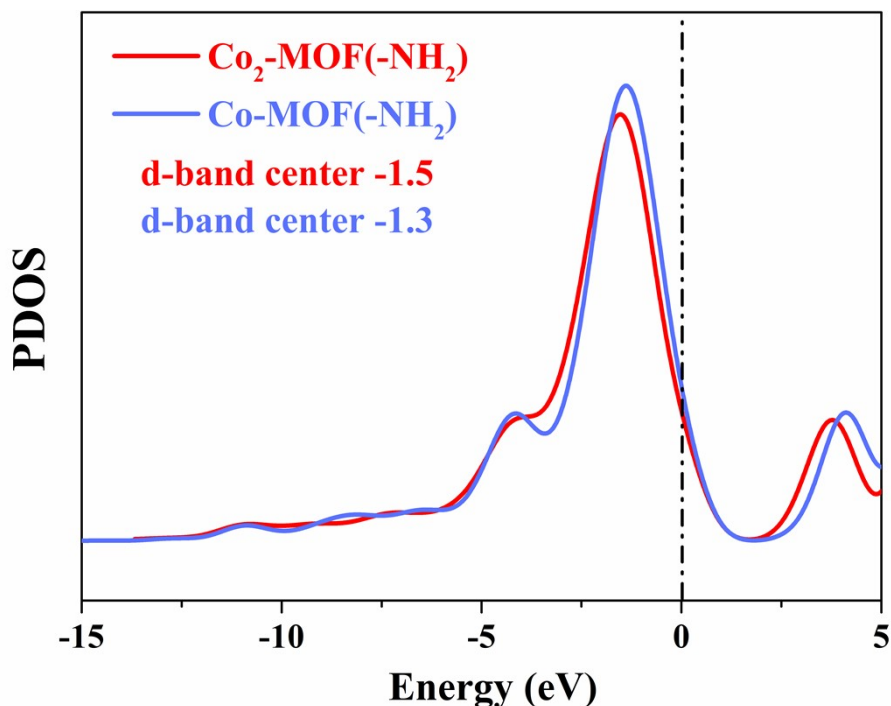

**Figure S20.** PDOS of d band center value of Co on Co<sub>2</sub>-MOF(-NH<sub>2</sub>) and Co-MOF(-NH<sub>2</sub>).

## 7. Density Functional Theory (DFT) Calculations.

The density functional theory calculations were performed using the hybrid B3LYP-D3 functional (with the Grimme's D3 dispersion correction)<sup>17-19</sup> as implemented in the Gaussian16 program.<sup>20</sup> The solvation effects of acetonitrile was taken into account by using the SMD-flavor<sup>21</sup> of self-consistent reaction field (SCRF) theory. All geometries were optimized with no constraint of freedom by using the SDD pseudopotential<sup>22</sup> for Co, 6-31G (d) basis set for the C, N, O and H elements. The harmonic frequencies were then computed analytically at the same level of theory as the geometry optimizations to characterize the nature of all stationary points as minima states and to gain the Gibbs free energy correction. In order to obtain more accurate relative energies, single point calculations using the def2tzvp basis set were performed based on the B3LYP-D3/mix basis set optimized molecular geometries. The solvation free energy was calculated based on the M06/def2tzvp basis set.<sup>23</sup> Gibbs free energy was calculated using zero-point energy and thermal corrections,

and the contributions from  $\Delta G_{298\text{oCH}_3\text{CN}}(\text{H}^+) = -266.48$  kcal/mol in acetonitrile, while  $\Delta G_{298\text{oCH}_3\text{CN}}(\text{H}^+)$  is the sum of  $\Delta G_{298\text{ogas}}(\text{H}^+) = -6.28$  kcal/mol and the solvation energy change of  $\text{H}^+$  in acetonitrile  $(-260.2$  kcal/mol)<sup>24-26</sup> and the 3D structures of molecules were generated using CYL View.<sup>27</sup>

## Cartesian coordination

### Cat.-Co<sub>2</sub>

|    | X          | Y          | Z          |   |            |            |            |
|----|------------|------------|------------|---|------------|------------|------------|
|    |            |            |            | C | 6.4846000  | -0.1645000 | 1.5502000  |
| Co | -0.0218000 | -1.4940000 | -0.6090000 | C | 2.6444000  | 2.4613000  | -0.2107000 |
| Co | 0.0208000  | 1.4924000  | -0.6185000 | H | 3.3680000  | 3.2763000  | -0.1563000 |
| O  | 1.2114000  | -0.0032000 | -0.4702000 | C | 1.2975000  | 4.1309000  | -1.1671000 |
| O  | -1.2150000 | 0.0294000  | -0.4841000 | H | 1.2244000  | 4.0653000  | -2.2595000 |
| O  | 7.0286000  | -1.2203000 | 1.7782000  | H | 2.2025000  | 4.7012000  | -0.9337000 |
| O  | 7.0289000  | 1.0459000  | 1.7630000  | C | 0.0730000  | 4.8615000  | -0.6120000 |
| H  | 7.9261000  | 0.9088000  | 2.1257000  | C | 0.0841000  | 4.8956000  | 0.9226000  |
| O  | -7.0316000 | 1.2162000  | 1.7843000  | H | 0.0666000  | 3.8922000  | 1.3615000  |
| O  | -7.0217000 | -1.0500000 | 1.7661000  | H | -0.7851000 | 5.4435000  | 1.3011000  |
| H  | -7.9186000 | -0.9172000 | 2.1310000  | H | 0.9796000  | 5.4080000  | 1.2894000  |
| N  | -1.4709000 | -2.7637000 | -0.6591000 | C | 0.0943000  | 6.2942000  | -1.1761000 |
| N  | 1.3905000  | -2.8054000 | -0.6489000 | H | 0.9880000  | 6.8278000  | -0.8378000 |
| N  | 1.4619000  | 2.7531000  | -0.6618000 | H | -0.7776000 | 6.8576000  | -0.8292000 |
| N  | -1.3845000 | 2.7985000  | -0.6523000 | H | 0.0889000  | 6.3007000  | -2.2719000 |
| C  | -1.3026000 | -4.1402000 | -1.1652000 | C | -1.1840000 | 4.1750000  | -1.1495000 |
| H  | -2.2040000 | -4.7152000 | -0.9292000 | H | -2.0658000 | 4.7722000  | -0.8955000 |
| H  | -1.2325000 | -4.0763000 | -2.2583000 | H | -1.1324000 | 4.1159000  | -2.2435000 |
| C  | -0.0713000 | -4.8650000 | -0.6131000 | C | -2.5736000 | 2.5371000  | -0.2013000 |
| C  | -0.0901000 | -6.2991000 | -1.1740000 | H | -3.2750000 | 3.3707000  | -0.1384000 |
| H  | -0.9827000 | -6.8338000 | -0.8345000 | C | -3.1322000 | 1.2673000  | 0.1816000  |
| H  | 0.7831000  | -6.8601000 | -0.8267000 | C | -4.4363000 | 1.2616000  | 0.7029000  |
| H  | -0.0854000 | -6.3074000 | -2.2698000 | H | -4.9587000 | 2.1961000  | 0.8871000  |
| C  | -0.0792000 | -4.8970000 | 0.9215000  | C | -5.1014000 | 0.0733000  | 0.9881000  |
| H  | -0.0656000 | -3.8933000 | 1.3610000  | C | -4.4719000 | -1.1342000 | 0.6957000  |
| H  | 0.7935000  | -5.4393000 | 1.2998000  | H | -5.0065000 | -2.0633000 | 0.8655000  |
| H  | -0.9719000 | -5.4120000 | 1.2914000  | C | -3.1661000 | -1.1745000 | 0.1744000  |
| C  | 1.1867000  | -4.1781000 | -1.1529000 | C | -2.4687000 | 0.0381000  | -0.0454000 |
| H  | 2.0681000  | -4.7787000 | -0.9057000 | C | -6.4833000 | 0.1634000  | 1.5535000  |
| H  | 1.1304000  | -4.1148000 | -2.2468000 | C | -2.6517000 | -2.4639000 | -0.2189000 |
| C  | 2.5771000  | -2.5387000 | -0.2036000 |   |            |            |            |
| H  | 3.2878000  | -3.3654000 | -0.1521000 |   |            |            |            |
| C  | 3.1277000  | -1.2622000 | 0.1846000  |   |            |            |            |

|   |           |            |            |
|---|-----------|------------|------------|
| C | 4.4313000 | -1.2557000 | 0.7027000  |
| H | 4.9544000 | -2.1904000 | 0.8844000  |
| C | 5.1018000 | -0.0678000 | 0.9881000  |
| C | 4.4770000 | 1.1403000  | 0.6986000  |
| H | 5.0124000 | 2.0691000  | 0.8677000  |
| C | 3.1684000 | 1.1797000  | 0.1799000  |
| C | 2.4673000 | -0.0290000 | -0.0382000 |

**Int.-1**

|    | X          | Y          | Z          |   |            |            |            |
|----|------------|------------|------------|---|------------|------------|------------|
|    |            |            |            | C | 4.5690000  | 1.2065000  | 0.5499000  |
| Co | -0.0020000 | -1.5747000 | -0.6692000 | H | 5.0951000  | 2.1396000  | 0.7217000  |
| Co | 0.0018000  | 1.5201000  | -0.5110000 | C | 3.2250000  | 1.2321000  | 0.1358000  |
| O  | 1.2372000  | 0.0698000  | -0.4212000 | C | 2.5103000  | 0.0240000  | -0.0984000 |
| O  | -1.2428000 | 0.0644000  | -0.4379000 | C | 6.6420000  | -0.0947000 | 1.1783000  |
| O  | 7.2391000  | -1.1389000 | 1.3321000  | C | 2.6492000  | 2.5125000  | -0.1354000 |
| O  | 7.1980000  | 1.1186000  | 1.3988000  | H | 3.3533000  | 3.3432000  | -0.0541000 |
| H  | 8.1165000  | 0.9542000  | 1.6848000  | C | 1.2505000  | 4.2126000  | -0.9130000 |
| O  | -7.2564000 | 1.1256000  | 1.3837000  | H | 1.2043000  | 4.2353000  | -2.0093000 |
| O  | -7.1933000 | -1.1322000 | 1.3399000  | H | 2.1337000  | 4.7886000  | -0.6142000 |
| H  | -8.1140000 | -0.9933000 | 1.6323000  | C | -0.0028000 | 4.8782000  | -0.3449000 |
| N  | -1.5137000 | -2.8706000 | -0.5727000 | C | -0.0370000 | 4.8004000  | 1.1873000  |
| N  | 1.4948000  | -2.8490000 | -0.6871000 | H | -0.0365000 | 3.7663000  | 1.5450000  |
| N  | 1.4371000  | 2.8076000  | -0.5104000 | H | -0.9342000 | 5.2929000  | 1.5779000  |
| N  | -1.4308000 | 2.8098000  | -0.5550000 | H | 0.8340000  | 5.3070000  | 1.6172000  |
| C  | -1.2881000 | -4.2915000 | -0.8589000 | C | 0.0049000  | 6.3481000  | -0.8004000 |
| H  | -2.1361000 | -4.8852000 | -0.4892000 | H | 0.8812000  | 6.8711000  | -0.4034000 |
| H  | -1.2621000 | -4.4061000 | -1.9507000 | H | -0.8863000 | 6.8699000  | -0.4367000 |
| C  | 0.0173000  | -4.8641000 | -0.2719000 | H | 0.0255000  | 6.4335000  | -1.8931000 |
| C  | 0.0184000  | -6.3740000 | -0.5760000 | C | -1.2276000 | 4.2081000  | -0.9686000 |
| H  | -0.8445000 | -6.8641000 | -0.1131000 | H | -2.1246000 | 4.7870000  | -0.7212000 |
| H  | 0.9223000  | -6.8483000 | -0.1799000 | H | -1.1267000 | 4.2162000  | -2.0612000 |
| H  | -0.0204000 | -6.5684000 | -1.6545000 | C | -2.6469000 | 2.5243000  | -0.1905000 |
| C  | 0.0828000  | -4.6407000 | 1.2450000  | H | -3.3528000 | 3.3553000  | -0.1343000 |
| H  | 0.0695000  | -3.5766000 | 1.4995000  | C | -3.2234000 | 1.2481000  | 0.1045000  |
| H  | 0.9981000  | -5.0772000 | 1.6602000  | C | -4.5636000 | 1.2349000  | 0.5191000  |
| H  | -0.7695000 | -5.1181000 | 1.7414000  | H | -5.1000000 | 2.1660000  | 0.6751000  |
| C  | 1.2560000  | -4.2667000 | -0.9749000 | C | -5.2351000 | 0.0390000  | 0.7310000  |
| H  | 2.1383000  | -4.8587000 | -0.6939000 | C | -4.5580000 | -1.1586000 | 0.4851000  |
| H  | 1.1286000  | -4.3646000 | -2.0606000 | H | -5.0927000 | -2.0929000 | 0.6209000  |
| C  | 2.6780000  | -2.5424000 | -0.2569000 | C | -3.2224000 | -1.2045000 | 0.0631000  |
| H  | 3.4001000  | -3.3505000 | -0.1017000 | C | -2.5121000 | 0.0308000  | -0.1011000 |
| C  | 3.2109000  | -1.2209000 | 0.0304000  | C | -6.6498000 | 0.0951000  | 1.1805000  |

|   |           |            |           |   |            |            |            |
|---|-----------|------------|-----------|---|------------|------------|------------|
| C | 4.5431000 | -1.1879000 | 0.4564000 | C | -2.7031000 | -2.5383000 | -0.1972000 |
| H | 5.0882000 | -2.1192000 | 0.5785000 | H | -3.4460000 | -3.3324000 | -0.0620000 |
| C | 5.2288000 | -0.0006000 | 0.7310000 |   |            |            |            |

**Int.-2**

|    | X          | Y          | Z          | H |            |            |            |
|----|------------|------------|------------|---|------------|------------|------------|
|    |            |            |            | H | 5.0986000  | -2.0014000 | -1.0418000 |
| Co | -0.0195000 | 1.4732000  | 0.3922000  | C | 3.2082000  | -1.1308000 | -0.4922000 |
| Co | 0.0182000  | -1.4112000 | 0.2916000  | C | 2.4862000  | 0.0816000  | -0.3340000 |
| O  | 1.2070000  | 0.0549000  | -0.0916000 | C | 6.6046000  | 0.2389000  | -1.5729000 |
| O  | -1.2091000 | 0.0244000  | -0.0894000 | C | 2.6611000  | -2.4067000 | -0.0857000 |
| O  | 7.1943000  | 1.2865000  | -1.7327000 | H | 3.3819000  | -3.2275000 | -0.1042000 |
| O  | 7.1646000  | -0.9722000 | -1.7869000 | C | 1.3021000  | -3.9906000 | 0.9759000  |
| H  | 8.0830000  | -0.8086000 | -2.0740000 | H | 1.2200000  | -3.8327000 | 2.0564000  |
| O  | -7.1967000 | -1.1048000 | -1.7939000 | H | 2.1966000  | -4.5952000 | 0.7840000  |
| O  | -7.1669000 | 1.1536000  | -1.7267000 | C | 0.0620000  | -4.7424000 | 0.4779000  |
| H  | -8.0851000 | 1.0050000  | -2.0221000 | C | 0.0628000  | -4.8715000 | -1.0510000 |
| N  | -1.4892000 | 2.7354000  | 0.5226000  | H | 0.0499000  | -3.8939000 | -1.5438000 |
| N  | 1.4166000  | 2.7733000  | 0.5244000  | H | -0.8147000 | -5.4321000 | -1.3919000 |
| N  | 1.4791000  | -2.6597000 | 0.3795000  | H | 0.9542000  | -5.4093000 | -1.3927000 |
| N  | -1.4093000 | -2.6979000 | 0.3812000  | C | 0.0809000  | -6.1373000 | 1.1274000  |
| C  | -1.3067000 | 4.0527000  | 1.1457000  | H | 0.9724000  | -6.6949000 | 0.8213000  |
| H  | -2.1980000 | 4.6654000  | 0.9641000  | H | -0.7958000 | -6.7183000 | 0.8225000  |
| H  | -1.2353000 | 3.8873000  | 2.2280000  | H | 0.0808000  | -6.0707000 | 2.2213000  |
| C  | -0.0629000 | 4.8130000  | 0.6663000  | C | -1.1971000 | -4.0239000 | 0.9772000  |
| C  | -0.0813000 | 6.1953000  | 1.3428000  | H | -2.0756000 | -4.6517000 | 0.7858000  |
| H  | -0.9724000 | 6.7588000  | 1.0473000  | H | -1.1184000 | -3.8641000 | 2.0576000  |
| H  | 0.7953000  | 6.7816000  | 1.0489000  | C | -2.5973000 | -2.4767000 | -0.0843000 |
| H  | -0.0811000 | 6.1096000  | 2.4356000  | H | -3.2972000 | -3.3152000 | -0.1032000 |
| C  | -0.0633000 | 4.9730000  | -0.8600000 | C | -3.1769000 | -1.2148000 | -0.4911000 |
| H  | -0.0511000 | 4.0070000  | -1.3751000 | C | -4.5117000 | -1.1949000 | -0.9063000 |
| H  | 0.8147000  | 5.5398000  | -1.1887000 | H | -5.0556000 | -2.1242000 | -1.0486000 |
| H  | -0.9540000 | 5.5186000  | -1.1903000 | C | -5.1940000 | 0.0052000  | -1.1234000 |
| C  | 1.1991000  | 4.0849000  | 1.1483000  | C | -4.5489000 | 1.2096000  | -0.8436000 |
| H  | 2.0747000  | 4.7203000  | 0.9694000  | H | -5.1012000 | 2.1395000  | -0.9308000 |
| H  | 1.1293000  | 3.9165000  | 2.2303000  | C | -3.2099000 | 1.2383000  | -0.4250000 |
| C  | 2.6011000  | 2.5629000  | 0.0424000  | C | -2.4882000 | 0.0174000  | -0.3331000 |
| H  | 3.3017000  | 3.4014000  | 0.0510000  | C | -6.6067000 | -0.0677000 | -1.5780000 |
| C  | 3.1749000  | 1.3222000  | -0.4244000 | C | -2.6681000 | 2.4930000  | 0.0408000  |
| C  | 4.5111000  | 1.3266000  | -0.8422000 | H | -3.3895000 | 3.3139000  | 0.0490000  |
| H  | 5.0543000  | 2.2625000  | -0.9361000 | C | 0.0126000  | -0.8411000 | 2.2333000  |
| C  | 5.1918000  | 0.1415000  | -1.1227000 | O | -0.0036000 | 0.4024000  | 2.2994000  |
| C  | 4.5454000  | -1.0777000 | -0.9067000 | O | 0.0260000  | -1.7943000 | 2.9776000  |

**Int.-3**

|    | X          | Y          | Z          |   |            |            |            |
|----|------------|------------|------------|---|------------|------------|------------|
|    |            |            |            | C | 3.2053000  | -0.9446000 | -0.4346000 |
| Co | -0.1300000 | 1.4839000  | 0.3301000  | C | 2.3971000  | 0.2343000  | -0.4650000 |
| Co | 0.0538000  | -1.4505000 | 0.5637000  | C | 6.5815000  | 0.5137000  | -1.4729000 |
| O  | 1.1103000  | 0.1604000  | -0.3371000 | C | 2.7454000  | -2.2395000 | 0.0336000  |
| O  | -1.2942000 | -0.0907000 | 0.2359000  | H | 3.5134000  | -3.0165000 | -0.0062000 |
| O  | 7.1279000  | 1.5707000  | -1.7099000 | C | 1.4665000  | -3.9477000 | 1.0252000  |
| O  | 7.2178000  | -0.6790000 | -1.5284000 | H | 1.1666000  | -3.8967000 | 2.0776000  |
| H  | 8.1407000  | -0.4884000 | -1.7818000 | H | 2.4406000  | -4.4501000 | 0.9770000  |
| O  | -7.1597000 | -1.4905000 | -1.7587000 | C | 0.4376000  | -4.7757000 | 0.2234000  |
| O  | -7.2834000 | 0.7525000  | -1.5188000 | C | 0.6938000  | -4.6652000 | -1.2857000 |
| H  | -8.1861000 | 0.5643000  | -1.8385000 | H | 0.5386000  | -3.6460000 | -1.6536000 |
| N  | -1.6713000 | 2.6194000  | 0.6389000  | H | 0.0186000  | -5.3284000 | -1.8371000 |
| N  | 1.1844000  | 2.9145000  | 0.1679000  | H | 1.7210000  | -4.9591000 | -1.5298000 |
| N  | 1.6045000  | -2.5717000 | 0.5440000  | C | 0.5833000  | -6.2395000 | 0.6765000  |
| N  | -1.3052000 | -2.9390000 | 0.2331000  | H | 1.5750000  | -6.6266000 | 0.4202000  |
| C  | -1.5064000 | 3.9664000  | 1.1892000  | H | -0.1596000 | -6.8752000 | 0.1833000  |
| H  | -2.4755000 | 4.4799000  | 1.1944000  | H | 0.4497000  | -6.3405000 | 1.7599000  |
| H  | -1.1814000 | 3.8582000  | 2.2309000  | C | -0.9918000 | -4.3344000 | 0.5680000  |
| C  | -0.4828000 | 4.8150000  | 0.4180000  | H | -1.7076000 | -5.0065000 | 0.0752000  |
| C  | -0.5383000 | 6.2401000  | 0.9964000  | H | -1.1379000 | -4.4375000 | 1.6514000  |
| H  | -1.5254000 | 6.6850000  | 0.8335000  | C | -2.4989000 | -2.7160000 | -0.2043000 |
| H  | 0.2015000  | 6.8850000  | 0.5108000  | H | -3.1480000 | -3.5776000 | -0.3964000 |
| H  | -0.3375000 | 6.2461000  | 2.0741000  | C | -3.1498000 | -1.4369000 | -0.4103000 |
| C  | -0.7997000 | 4.8442000  | -1.0833000 | C | -4.4769000 | -1.4641000 | -0.8525000 |
| H  | -0.7281000 | 3.8508000  | -1.5375000 | H | -4.9474000 | -2.4114000 | -1.0994000 |
| H  | -0.1010000 | 5.5039000  | -1.6091000 | C | -5.2430000 | -0.3041000 | -0.9761000 |
| H  | -1.8125000 | 5.2236000  | -1.2593000 | C | -4.6767000 | 0.9156000  | -0.6091000 |
| C  | 0.9253000  | 4.2716000  | 0.6779000  | H | -5.2806000 | 1.8161000  | -0.6541000 |
| H  | 1.6622000  | 4.9632000  | 0.2519000  | C | -3.3472000 | 0.9993000  | -0.1739000 |
| H  | 1.0965000  | 4.2383000  | 1.7620000  | C | -2.5481000 | -0.1785000 | -0.1092000 |
| C  | 2.3698000  | 2.7364000  | -0.3291000 | C | -6.6421000 | -0.4365000 | -1.4554000 |
| H  | 3.0010000  | 3.6212000  | -0.4452000 | C | -2.8716000 | 2.2822000  | 0.2920000  |
| C  | 3.0360000  | 1.4965000  | -0.6391000 | H | -3.6521000 | 3.0416000  | 0.3858000  |
| C  | 4.3922000  | 1.5443000  | -0.9814000 | C | 0.4683000  | -0.5327000 | 2.2262000  |
| H  | 4.8861000  | 2.4979000  | -1.1444000 | O | 0.3727000  | 0.7086000  | 2.3173000  |
| C  | 5.1531000  | 0.3814000  | -1.0935000 | O | 0.8713000  | -1.2142000 | 3.3140000  |
| C  | 4.5591000  | -0.8449000 | -0.7817000 | H | 1.0190000  | -0.5664000 | 4.0384000  |
| H  | 5.1728000  | -1.7400000 | -0.7874000 |   |            |            |            |



**Int.-4**

|    | X          | Y          | Z          |   |            |            |            |
|----|------------|------------|------------|---|------------|------------|------------|
|    |            |            |            | C | 3.1406000  | -1.1339000 | -0.3875000 |
| Co | -0.0232000 | 1.5150000  | 0.5822000  | C | 2.4444000  | 0.0744000  | -0.1373000 |
| Co | 0.0348000  | -1.4764000 | 0.6399000  | C | 6.3361000  | 0.2297000  | -2.0101000 |
| O  | 1.2335000  | 0.0568000  | 0.3914000  | C | 2.6565000  | -2.4320000 | 0.0327000  |
| O  | -1.1842000 | 0.0041000  | 0.2509000  | H | 3.3891000  | -3.2355000 | -0.0668000 |
| O  | 6.8527000  | 1.2854000  | -2.2952000 | C | 1.3437000  | -4.1223000 | 1.0131000  |
| O  | 6.8769000  | -0.9799000 | -2.2377000 | H | 1.2321000  | -4.0814000 | 2.1038000  |
| H  | 7.7455000  | -0.8415000 | -2.6639000 | H | 2.2585000  | -4.6852000 | 0.7989000  |
| O  | -6.8774000 | -1.2374000 | -2.2578000 | C | 0.1385000  | -4.8492000 | 0.3996000  |
| O  | -6.8982000 | 1.0282000  | -2.2231000 | C | 0.2069000  | -4.8427000 | -1.1338000 |
| H  | -7.7767000 | 0.8857000  | -2.6269000 | H | 0.1864000  | -3.8285000 | -1.5471000 |
| N  | -1.4638000 | 2.7544000  | 0.4791000  | H | -0.6379000 | -5.3950000 | -1.5584000 |
| N  | 1.3591000  | 2.8247000  | 0.5063000  | H | 1.1244000  | -5.3294000 | -1.4811000 |
| N  | 1.5071000  | -2.7389000 | 0.5389000  | C | 0.1566000  | -6.2955000 | 0.9275000  |
| N  | -1.3581000 | -2.8126000 | 0.4324000  | H | 1.0681000  | -6.8109000 | 0.6090000  |
| C  | -1.3271000 | 4.0888000  | 1.0842000  | H | -0.6957000 | -6.8597000 | 0.5362000  |
| H  | -2.2409000 | 4.6584000  | 0.8866000  | H | 0.1122000  | -6.3292000 | 2.0220000  |
| H  | -1.2549000 | 3.9295000  | 2.1655000  | C | -1.1557000 | -4.1953000 | 0.8998000  |
| C  | -0.1113000 | 4.8754000  | 0.5833000  | H | -2.0135000 | -4.8038000 | 0.5944000  |
| C  | -0.1529000 | 6.2651000  | 1.2445000  | H | -1.1507000 | -4.1667000 | 1.9969000  |
| H  | -1.0506000 | 6.8102000  | 0.9367000  | C | -2.5073000 | -2.5496000 | -0.0997000 |
| H  | 0.7145000  | 6.8619000  | 0.9455000  | H | -3.1939000 | -3.3862000 | -0.2434000 |
| H  | -0.1571000 | 6.1938000  | 2.3379000  | C | -3.0559000 | -1.2670000 | -0.4829000 |
| C  | -0.1222000 | 5.0127000  | -0.9454000 | C | -4.3315000 | -1.2623000 | -1.0648000 |
| H  | -0.0827000 | 4.0418000  | -1.4522000 | H | -4.8385000 | -2.1982000 | -1.2827000 |
| H  | 0.7344000  | 5.6036000  | -1.2860000 | C | -4.9986000 | -0.0760000 | -1.3703000 |
| H  | -1.0291000 | 5.5273000  | -1.2795000 | C | -4.3981000 | 1.1353000  | -1.0454000 |
| C  | 1.1600000  | 4.1742000  | 1.0693000  | H | -4.9332000 | 2.0608000  | -1.2321000 |
| H  | 2.0363000  | 4.7842000  | 0.8277000  | C | -3.1150000 | 1.1789000  | -0.4676000 |
| H  | 1.1222000  | 4.0620000  | 2.1587000  | C | -2.4173000 | -0.0285000 | -0.2202000 |
| C  | 2.5184000  | 2.5752000  | -0.0232000 | C | -6.3529000 | -0.1795000 | -1.9956000 |
| H  | 3.1997000  | 3.4211000  | -0.1283000 | C | -2.6173000 | 2.4576000  | -0.0339000 |
| C  | 3.0698000  | 1.3115000  | -0.4366000 | H | -3.3420000 | 3.2705000  | -0.1037000 |
| C  | 4.3357000  | 1.3163000  | -1.0455000 | O | -0.0826000 | 1.4460000  | 2.3762000  |
| H  | 4.8310000  | 2.2540000  | -1.2817000 | H | 0.8352000  | 1.5392000  | 2.6909000  |
| C  | 4.9968000  | 0.1315000  | -1.3520000 | C | -0.1151000 | -1.3319000 | 2.7188000  |
| C  | 4.4053000  | -1.0807000 | -0.9983000 | O | -0.2386000 | -1.3861000 | 3.8437000  |
| H  | 4.9410000  | -2.0042000 | -1.1942000 |   |            |            |            |

**Cat.-Co**

|    | X          | Y          | Z          |   |            |            |            |
|----|------------|------------|------------|---|------------|------------|------------|
| Co | -0.0232420 | -1.3126130 | -0.7352420 | H | -1.2535550 | -3.9482570 | -2.2925030 |
| O  | -1.2504040 | 0.1263320  | -0.6664560 | H | -2.2185860 | -4.5619820 | -0.9472990 |
| O  | 1.2545090  | 0.0817030  | -0.6663740 | C | -0.0849650 | -4.7041560 | -0.6475060 |
| O  | -6.9261740 | 1.4059830  | 1.8923120  | C | -0.0857530 | -4.7121750 | 0.8865120  |
| O  | -6.9035940 | -0.8457010 | 1.9704470  | H | -0.0677360 | -3.6981920 | 1.2956910  |
| H  | -7.7627670 | -0.6327440 | 2.3784900  | H | 0.7903520  | -5.2472210 | 1.2705130  |
| O  | 6.9435430  | -1.0025290 | 1.9953510  | H | -0.9808350 | -5.2155760 | 1.2696730  |
| O  | 6.8990540  | 1.2460700  | 1.8634240  | C | -0.1109500 | -6.1453540 | -1.1828370 |
| H  | 7.7611740  | 1.0834940  | 2.2882590  | H | -1.0058710 | -6.6730110 | -0.8350450 |
| N  | 1.6195440  | 2.8702570  | -1.0614990 | H | 0.7636680  | -6.7052740 | -0.8339450 |
| N  | -1.5142020 | 2.9275130  | -1.0630610 | H | -0.1106300 | -6.1667300 | -2.2793300 |
| N  | -1.4811820 | -2.6075680 | -0.7127670 | C | 1.1771720  | -4.0262420 | -1.1953040 |
| N  | 1.3866510  | -2.6598670 | -0.7113640 | H | 2.0527340  | -4.6397760 | -0.9451860 |
| C  | 1.3682170  | 4.2595140  | -1.3773330 | H | 1.1120170  | -3.9912350 | -2.2913010 |
| H  | 2.2188840  | 4.9009960  | -1.0752310 | C | 2.5658420  | -2.4149520 | -0.2135550 |
| H  | 1.2672520  | 4.3444390  | -2.4680470 | H | 3.2456350  | -3.2647730 | -0.1030560 |
| C  | 0.0879660  | 4.8450790  | -0.7274140 | C | 3.1157010  | -1.1526400 | 0.1577600  |
| C  | 0.1158620  | 6.3635910  | -0.9833780 | C | 4.3875080  | -1.1357950 | 0.7505650  |
| H  | 1.0098140  | 6.8182200  | -0.5417870 | H | 4.8859450  | -2.0671930 | 1.0045560  |
| H  | -0.7610800 | 6.8505380  | -0.5422520 | C | 5.0354100  | 0.0599830  | 1.0191700  |
| H  | 0.1201960  | 6.5871410  | -2.0577490 | C | 4.4094970  | 1.2638580  | 0.6304590  |
| C  | 0.0823420  | 4.5707730  | 0.7809470  | H | 4.9318740  | 2.1989230  | 0.8080920  |
| H  | 0.0629920  | 3.4966530  | 0.9798410  | C | 3.1663640  | 1.3064290  | 0.0174380  |
| H  | -0.7965640 | 5.0256390  | 1.2541640  | C | 2.4400310  | 0.0728240  | -0.1873450 |
| H  | 0.9765800  | 4.9939750  | 1.2549730  | C | 6.3591010  | 0.0132510  | 1.6625580  |
| C  | -1.2123950 | 4.3069190  | -1.3783930 | C | 2.6750330  | 2.6273780  | -0.3925240 |
| H  | -2.0391880 | 4.9788530  | -1.0767760 | H | 3.3493630  | 3.4499750  | -0.0859020 |
| H  | -1.1075500 | 4.3883090  | -2.4690180 |   |            |            |            |
| C  | -2.5783830 | 2.7235730  | -0.3947110 |   |            |            |            |
| H  | -3.2229790 | 3.5691510  | -0.0880700 |   |            |            |            |
| C  | -3.1169800 | 1.4206870  | 0.0143550  |   |            |            |            |
| C  | -4.3593420 | 1.4203460  | 0.6259700  |   |            |            |            |
| H  | -4.8613960 | 2.3658300  | 0.8113810  |   |            |            |            |
| C  | -5.0307740 | 0.2412010  | 1.0150490  |   |            |            |            |
| C  | -4.4293650 | -0.9788030 | 0.7480370  |   |            |            |            |
| H  | -4.9474020 | -1.9006150 | 0.9943040  |   |            |            |            |
| C  | -3.1563270 | -1.0391580 | 0.1551130  |   |            |            |            |
| C  | -2.4359900 | 0.1606910  | -0.1892350 |   |            |            |            |
| C  | -6.3515220 | 0.3598080  | 1.6536730  |   |            |            |            |

|   |            |            |            |
|---|------------|------------|------------|
| C | -2.6514690 | -2.3195590 | -0.2161950 |
| H | -3.3609290 | -3.1451490 | -0.1067390 |
| C | -1.3210010 | -3.9805830 | -1.1965400 |

**Int.-1**

|    | X          | Y          | Z          |   |            |            |            |
|----|------------|------------|------------|---|------------|------------|------------|
|    |            |            |            | C | -4.7122020 | -0.9864470 | 0.2910390  |
| Co | -0.0199230 | -1.3123470 | -0.5687130 | H | -5.2578470 | -1.9172140 | 0.4201070  |
| O  | -1.3461620 | 0.1836850  | -0.4562550 | C | -3.3528830 | -1.0414790 | -0.0435760 |
| O  | 1.3497370  | 0.1443160  | -0.4535320 | C | -2.5914800 | 0.1893690  | -0.2160410 |
| O  | -7.4519190 | 1.3204890  | 0.9856770  | C | -6.7971240 | 0.3001130  | 0.8218420  |
| O  | -7.3954220 | -0.9268080 | 0.9769110  | C | -2.7787170 | -2.3418580 | -0.2165830 |
| H  | -8.3153050 | -0.7084390 | 1.2103100  | H | -3.4945850 | -3.1652480 | -0.0877000 |
| O  | 7.4595000  | -1.0225990 | 0.9922850  | C | -1.3239870 | -4.0889450 | -0.7336320 |
| O  | 7.3944510  | 1.2242610  | 0.9697650  | H | -1.2440710 | -4.2756630 | -1.8157210 |
| H  | 8.3155160  | 1.0124480  | 1.2047680  | H | -2.1980150 | -4.6608960 | -0.3787020 |
| N  | 1.6615650  | 2.9693850  | -0.7793990 | C | -0.0652920 | -4.6673580 | -0.0628460 |
| N  | -1.5743510 | 3.0167950  | -0.7827670 | C | -0.0543380 | -4.3691250 | 1.4410900  |
| N  | -1.5406180 | -2.6626180 | -0.5181240 | H | -0.0397540 | -3.2920760 | 1.6235620  |
| N  | 1.4639560  | -2.7065390 | -0.5265830 | H | 0.8304810  | -4.8106290 | 1.9164440  |
| C  | 1.3560550  | 4.3763690  | -0.8832060 | H | -0.9457120 | -4.7880420 | 1.9246760  |
| H  | 2.1944120  | 4.9999700  | -0.5077730 | C | -0.0878990 | -6.1896630 | -0.2889000 |
| H  | 1.2247240  | 4.6240000  | -1.9473750 | H | -0.9789980 | -6.6389600 | 0.1653580  |
| C  | 0.0692750  | 4.8131360  | -0.1317140 | H | 0.7932110  | -6.6642160 | 0.1590040  |
| C  | 0.0917900  | 6.3517170  | -0.0692120 | H | -0.0952150 | -6.4349790 | -1.3588290 |
| H  | 0.9830370  | 6.7097130  | 0.4597700  | C | 1.2035260  | -4.1249790 | -0.7448420 |
| H  | -0.7900700 | 6.7355620  | 0.4572460  | H | 2.0637160  | -4.7237050 | -0.4007980 |
| H  | 0.0995790  | 6.7917030  | -1.0757060 | H | 1.1069960  | -4.3047400 | -1.8266460 |
| C  | 0.0584620  | 4.2272430  | 1.2844170  | C | 2.7105360  | -2.4235060 | -0.2251090 |
| H  | 0.0422220  | 3.1359510  | 1.2394000  | H | 3.4031820  | -3.2667950 | -0.0999880 |
| H  | -0.8258660 | 4.5677160  | 1.8384430  | C | 3.3209670  | -1.1399530 | -0.0473940 |
| H  | 0.9508970  | 4.5413830  | 1.8411180  | C | 4.6796350  | -1.1222500 | 0.2865380  |
| C  | -1.2273650 | 4.4141420  | -0.8874540 | H | 5.2135610  | -2.0605470 | 0.4158970  |
| H  | -2.0480640 | 5.0627340  | -0.5158290 | C | 5.3881700  | 0.0667710  | 0.4640340  |
| H  | -1.0849180 | 4.6563720  | -1.9514300 | C | 4.7039590  | 1.2867240  | 0.2768600  |
| C  | -2.7177980 | 2.7565110  | -0.2814020 | H | 5.2500810  | 2.2174800  | 0.4000000  |
| H  | -3.3861230 | 3.5856710  | 0.0304510  | C | 3.3621450  | 1.3388120  | -0.0728500 |
| C  | -3.3229320 | 1.4376800  | -0.0778340 | C | 2.5948260  | 0.1128440  | -0.2146240 |
| C  | -4.6643650 | 1.4223130  | 0.2714130  | C | 6.8013290  | -0.0047380 | 0.8226340  |
| H  | -5.1982910 | 2.3606860  | 0.3956920  | C | 2.7949530  | 2.6745190  | -0.2746150 |
| C  | -5.3845640 | 0.2243810  | 0.4632410  | H | 3.4857160  | 3.4841380  | 0.0411580  |

**Int.-2**

|    | X          | Y          | Z          | C |            |            |            |
|----|------------|------------|------------|---|------------|------------|------------|
| Co | -0.0195410 | -1.2602710 | 1.0130380  | C | 3.1182840  | -1.0301370 | -0.3617940 |
| O  | 1.5059210  | 0.1183500  | 0.9672200  | C | 2.5478220  | 0.1594060  | 0.2618850  |
| O  | -1.2400680 | 0.2657470  | 0.4177390  | C | 6.2502240  | 0.3390700  | -2.0031010 |
| O  | 6.9003240  | 1.3568160  | -2.1953120 | C | 2.5322360  | -2.3348590 | -0.2142320 |
| O  | 6.6841980  | -0.8599050 | -2.5117350 | H | 3.1639190  | -3.1528870 | -0.5910370 |
| H  | 7.5117430  | -0.6339210 | -2.9727210 | C | 1.1193440  | -4.0820850 | 0.4440930  |
| O  | -7.0076390 | -0.4077580 | -2.2228130 | H | 1.0726720  | -4.3017710 | 1.5158080  |
| O  | -6.8047230 | 1.8279480  | -2.0827660 | H | 1.9478070  | -4.6636880 | 0.0069440  |
| H  | -7.6718850 | 1.6953260  | -2.5058130 | C | -0.1990690 | -4.5489670 | -0.2062490 |
| N  | -1.4240550 | 3.0836530  | 0.8358420  | C | -0.2551900 | -4.1367180 | -1.6819130 |
| N  | 1.7072340  | 2.9594650  | 1.1237230  | H | -0.2158420 | -3.0497180 | -1.7900720 |
| N  | 1.3934920  | -2.6559260 | 0.3095540  | H | -1.1817830 | -4.4909850 | -2.1508060 |
| N  | -1.6076110 | -2.5643400 | 0.4163080  | H | 0.5895820  | -4.5648520 | -2.2361010 |
| C  | -1.1171690 | 4.4463790  | 1.1989370  | C | -0.2405690 | -6.0822240 | -0.0864280 |
| H  | -1.8989230 | 5.1483390  | 0.8396830  | H | 0.6098400  | -6.5387190 | -0.6068380 |
| H  | -1.1079070 | 4.5098850  | 2.2970040  | H | -1.1598410 | -6.4837780 | -0.5289990 |
| C  | 0.2502410  | 4.9620130  | 0.6816680  | H | -0.2039810 | -6.3976880 | 0.9634100  |
| C  | 0.2870930  | 6.4779440  | 0.9494250  | C | -1.4205150 | -4.0017190 | 0.5652020  |
| H  | -0.5366750 | 6.9872190  | 0.4352740  | H | -2.3190770 | -4.5375350 | 0.2170740  |
| H  | 1.2277180  | 6.9157770  | 0.5950100  | H | -1.2829960 | -4.2186090 | 1.6287890  |
| H  | 0.1986670  | 6.6946330  | 2.0222210  | C | -2.7210430 | -2.1870810 | -0.1201550 |
| C  | 0.3793660  | 4.6932270  | -0.8218130 | H | -3.4321760 | -2.9703400 | -0.4213310 |
| H  | 0.3370080  | 3.6202170  | -1.0213440 | C | -3.1909620 | -0.8495790 | -0.3758550 |
| H  | 1.3310820  | 5.0808410  | -1.2072460 | C | -4.4468840 | -0.7302210 | -0.9703830 |
| H  | -0.4348740 | 5.1808090  | -1.3732950 | H | -5.0056150 | -1.6240750 | -1.2370910 |
| C  | 1.4525700  | 4.3425160  | 1.4454540  | C | -5.0247380 | 0.5117830  | -1.2397110 |
| H  | 2.3390440  | 4.9778030  | 1.2386080  | C | -4.3146150 | 1.6688590  | -0.8545400 |
| H  | 1.2437850  | 4.4150150  | 2.5223230  | H | -4.7730370 | 2.6393940  | -1.0233450 |
| C  | 2.8038050  | 2.7104520  | 0.5246210  | C | -3.0679980 | 1.6196670  | -0.2534030 |
| H  | 3.5130880  | 3.5326780  | 0.2961640  | C | -2.4141880 | 0.3334430  | -0.0350370 |
| C  | 3.2716550  | 1.4093980  | 0.0404230  | C | -6.3365010 | 0.5553440  | -1.8776770 |
| C  | 4.4464830  | 1.4074010  | -0.6880330 | C | -2.4956460 | 2.8999690  | 0.1710170  |
| H  | 4.9781600  | 2.3426520  | -0.8449330 | H | -3.1290950 | 3.7664450  | -0.1121220 |
| C  | 5.0003300  | 0.2396630  | -1.2570340 | C | -0.1329080 | -2.0560470 | 2.8859840  |
| C  | 4.3161940  | -0.9624870 | -1.0780980 | O | -0.4623750 | -0.9193880 | 3.2155060  |
| H  | 4.7251560  | -1.8735190 | -1.5065870 | O | 0.0772020  | -3.1798170 | 3.3048910  |

**Int.-3**

|    | X          | Y          | Z          | C |            |            |            |
|----|------------|------------|------------|---|------------|------------|------------|
| Co | -0.1766940 | -1.2490170 | 0.9571050  | C | 2.7772370  | -1.2482210 | -0.6524580 |
| O  | 1.3957750  | -0.1178300 | 0.9676340  | C | 2.3920710  | -0.1201430 | 0.1892400  |
| O  | -1.0085490 | 0.3218030  | -0.0139150 | C | 6.0228280  | -0.0370340 | -2.2016520 |
| O  | 6.8024940  | 0.9042770  | -2.2600100 | C | 2.0655880  | -2.5051500 | -0.6511010 |
| O  | 6.2771060  | -1.1818580 | -2.9173010 | H | 2.6283190  | -3.3460450 | -1.0878970 |
| H  | 7.1158270  | -0.9899380 | -3.3733760 | C | 0.5459890  | -4.1381470 | 0.0112110  |
| O  | -7.0951480 | 0.3108310  | -1.8599100 | H | 0.8566650  | -4.4281060 | 1.0245640  |
| O  | -6.5368470 | 2.4803010  | -2.0652130 | H | 1.1136290  | -4.7687480 | -0.6952850 |
| H  | -7.4501090 | 2.4385820  | -2.4009770 | C | -0.9519850 | -4.4418400 | -0.1390800 |
| N  | -1.0668090 | 3.2024070  | 0.7631410  | C | -1.4263650 | -4.0603960 | -1.5472140 |
| N  | 1.8931480  | 2.6480120  | 1.3795670  | H | -1.2299230 | -3.0056040 | -1.7561740 |
| N  | 0.9055940  | -2.7374310 | -0.1512730 | H | -2.5022110 | -4.2394670 | -1.6667680 |
| N  | -1.8365250 | -2.2666250 | 0.7371300  | H | -0.8999390 | -4.6595500 | -2.3005270 |
| C  | -0.6550240 | 4.5324800  | 1.1489330  | C | -1.1456640 | -5.9504830 | 0.0889430  |
| H  | -1.2652070 | 5.3095660  | 0.6431860  | H | -0.5491390 | -6.5342690 | -0.6224460 |
| H  | -0.8389460 | 4.6338000  | 2.2291090  | H | -2.1967520 | -6.2334390 | -0.0425030 |
| C  | 0.8331620  | 4.8647330  | 0.8910200  | H | -0.8419740 | -6.2400100 | 1.1025450  |
| C  | 1.0362240  | 6.3425250  | 1.2720270  | C | -1.7791960 | -3.7101660 | 0.9502720  |
| H  | 0.3688300  | 6.9934990  | 0.6943850  | H | -2.7982840 | -4.1259580 | 0.9387340  |
| H  | 2.0675390  | 6.6578650  | 1.0751510  | H | -1.3493340 | -3.8939320 | 1.9358010  |
| H  | 0.8307770  | 6.5105780  | 2.3373860  | C | -2.9285760 | -1.8309780 | 0.1950650  |
| C  | 1.1608900  | 4.6602760  | -0.5927490 | H | -3.7391930 | -2.5532080 | 0.0451040  |
| H  | 0.9784860  | 3.6247590  | -0.8883590 | C | -3.2314090 | -0.4988430 | -0.2477000 |
| H  | 2.2123470  | 4.8963220  | -0.7990550 | C | -4.5121050 | -0.2586120 | -0.7447380 |
| H  | 0.5376700  | 5.3143180  | -1.2163290 | H | -5.2278140 | -1.0739220 | -0.8148240 |
| C  | 1.7927220  | 4.0286370  | 1.7845630  | C | -4.9118940 | 1.0118190  | -1.1637680 |
| H  | 2.7807810  | 4.5333480  | 1.7636410  | C | -4.0083680 | 2.0806840  | -0.9771000 |
| H  | 1.4228460  | 4.0722350  | 2.8183350  | H | -4.3435780 | 3.0894740  | -1.2017760 |
| C  | 2.9674470  | 2.3207730  | 0.7767470  | C | -2.7328820 | 1.9033490  | -0.4664370 |
| H  | 3.7809870  | 3.0647000  | 0.6513210  | C | -2.2355780 | 0.5561970  | -0.2195640 |
| C  | 3.2659540  | 1.0471320  | 0.1221810  | C | -6.2543100 | 1.1865720  | -1.7078990 |
| C  | 4.4131090  | 1.0200630  | -0.6518020 | C | -2.0165120 | 3.1234860  | -0.0822910 |
| H  | 5.0525770  | 1.8985040  | -0.6858210 | H | -2.4623480 | 4.0443410  | -0.5106140 |
| C  | 4.7918390  | -0.0947940 | -1.4239050 | C | 0.3047500  | -2.1176870 | 2.6039300  |
| C  | 3.9518580  | -1.2110450 | -1.4030200 | O | -0.4370160 | -2.3966170 | 3.5427720  |
| H  | 4.2257990  | -2.0873850 | -1.9840730 | O | 1.6445900  | -2.4485340 | 2.7571760  |
|    |            |            |            | H | 1.6945050  | -2.8134960 | 3.6659630  |

**Int.-4**

|    | X          | Y          | Z          | C |            |            |            |
|----|------------|------------|------------|---|------------|------------|------------|
| Co | -0.0295000 | -1.2542000 | -0.8629000 | C | -3.1869000 | -0.9842000 | 0.2081000  |
|    |            |            |            | C | -2.5146000 | 0.2065000  | -0.2942000 |
| O  | -1.4315000 | 0.1785000  | -0.9485000 | C | -6.2899000 | 0.4827000  | 1.8263000  |
| O  | 1.4920000  | 0.2504000  | -1.0393000 | C | -2.6992000 | -2.3296000 | -0.0043000 |
| O  | -6.8880000 | 1.5240000  | 2.0600000  | H | -3.3733000 | -3.1140000 | 0.3760000  |
| O  | -6.8155000 | -0.7169000 | 2.2395000  | C | -1.3694000 | -4.1143000 | -0.7297000 |
| H  | -7.6443000 | -0.4675000 | 2.6859000  | H | -1.3595000 | -4.3553000 | -1.8039000 |
| O  | 6.8585000  | -0.8837000 | 2.2240000  | H | -2.1901000 | -4.6960000 | -0.2747000 |
| O  | 6.8327000  | 1.3626000  | 2.1141000  | C | -0.0333000 | -4.5935000 | -0.1193000 |
| H  | 7.6518000  | 1.1541000  | 2.5979000  | C | 0.0532000  | -4.2142000 | 1.3646000  |
| N  | 1.6772000  | 3.0705000  | -0.9920000 | H | 0.0190000  | -3.1283000 | 1.4995000  |
| N  | -1.5081000 | 3.0030000  | -1.0210000 | H | 0.9882000  | -4.5915000 | 1.7994000  |
| N  | -1.6145000 | -2.6940000 | -0.5873000 | H | -0.7792000 | -4.6677000 | 1.9190000  |
| N  | 1.4573000  | -2.6191000 | -0.6771000 | C | 0.0077000  | -6.1238000 | -0.2843000 |
| C  | 1.3846000  | 4.4706000  | -1.1737000 | H | -0.8425000 | -6.5925000 | 0.2249000  |
| H  | 2.1907000  | 5.1140000  | -0.7617000 | H | 0.9260000  | -6.5366000 | 0.1490000  |
| H  | 1.3294000  | 4.6751000  | -2.2536000 | H | -0.0289000 | -6.4180000 | -1.3418000 |
| C  | 0.0476000  | 4.9333000  | -0.5364000 | C | 1.1777000  | -4.0287000 | -0.9011000 |
| C  | 0.0059000  | 6.4680000  | -0.6594000 | H | 2.0650000  | -4.6265000 | -0.6378000 |
| H  | 0.8681000  | 6.9255000  | -0.1597000 | H | 0.9965000  | -4.1776000 | -1.9758000 |
| H  | -0.9038000 | 6.8731000  | -0.2008000 | C | 2.5998000  | -2.3182000 | -0.1576000 |
| H  | 0.0210000  | 6.7834000  | -1.7112000 | H | 3.2639000  | -3.1517000 | 0.1117000  |
| C  | -0.0021000 | 4.5266000  | 0.9404000  | C | 3.1546000  | -1.0166000 | 0.1157000  |
| H  | 0.0371000  | 3.4396000  | 1.0376000  | C | 4.3641000  | -0.9952000 | 0.8049000  |
| H  | -0.9272000 | 4.8818000  | 1.4119000  | H | 4.8231000  | -1.9298000 | 1.1187000  |
| H  | 0.8463000  | 4.9556000  | 1.4891000  | C | 5.0230000  | 0.1967000  | 1.1245000  |
| C  | -1.1997000 | 4.3889000  | -1.2876000 | C | 4.4277000  | 1.4094000  | 0.7189000  |
| H  | -2.0551000 | 5.0472000  | -1.0292000 | H | 4.9234000  | 2.3424000  | 0.9737000  |
| H  | -1.0201000 | 4.5013000  | -2.3667000 | C | 3.2398000  | 1.4602000  | 0.0089000  |
| C  | -2.6198000 | 2.7760000  | -0.4382000 | C | 2.5422000  | 0.2266000  | -0.3501000 |
| H  | -3.2877000 | 3.6219000  | -0.1742000 | C | 6.2835000  | 0.1314000  | 1.8520000  |
| C  | -3.1720000 | 1.4807000  | -0.0322000 | C | 2.7327000  | 2.7895000  | -0.3320000 |
| C  | -4.3778000 | 1.5129000  | 0.6486000  | H | 3.3765000  | 3.6070000  | 0.0550000  |
| H  | -4.8588000 | 2.4693000  | 0.8378000  | C | -0.0613000 | -1.4008000 | -2.6784000 |
| C  | -5.0193000 | 0.3532000  | 1.1226000  | O | -0.0775000 | -1.4662000 | -3.8248000 |
| C  | -4.4003000 | -0.8783000 | 0.8859000  | O | -0.0770000 | 2.3495000  | -2.1156000 |
| H  | -4.8834000 | -1.7856000 | 1.2378000  | H | -0.1095000 | 2.6252000  | -3.1098000 |

## References

- 1 T. Routasalo, J. Helaja, J. Kavakka and A. M. P. Koskinen, *Eur. J. Org. Chem.*, 2008, **2008**, 3190-3199.
- 2 M. Zhou, Z. F. Ju and D. Q. Yuan, *Chem. Commun.*, 2018, **54**, 2998-3001.
- 3 S. Pappuru, K. B. Idrees, Z. Chen, D. Shpasser and O. M. Gazit, *Dalton Trans.*, 2021, **50**, 6631-6636.
- 4 W. Morris, B. Voloskiy, S. Demir, F. Gándara, P. L. McGrier, H. Furukawa, D. Cascio, J. F. Stoddart and O. M. Yaghi, *Inorg. Chem.*, 2012, **51**, 6443-6445.
- 5 Y. A. Li, S. Yang, Q. Y. Li, J. P. Ma, S. J. Zhang and Y. B. Dong, *Inorg. Chem.*, 2017, **56**, 13241-13248.
- 6 H.-Q. Xu, J. Hu, D. Wang, Z. Li, Q. Zhang, Y. Luo, S.-H. Yu and H.-L. Jiang, *Journal of the American Chemical Society*, 2015, **137**, 13440-13443.
- 7 D. S. Chen, H. Z. Xing, C. G. Wang and Z. M. Su, *J. Mater. Chem. A*, 2016, **4**, 2657-2662.
- 8 H. B. Zhang, J. Wei, J. C. Dong, G. G. Liu, L. Shi, P. F. An, G. X. Zhao, J. T. Kong, X. J. Wang, X. G. Meng, J. Zhang and J. H. Ye, *Angew. Chem. Int. Ed.*, 2016, **55**, 14310-14314.
- 9 U. J. Ryu, S. J. Kim, H.-K. Lim, H. Kim, K. M. Choi and J. K. Kang, *Sci. Rep.*, 2017, **7**, 612.
- 10 K. M. Choi, D. Kim, B. Rungtaweevoranit, C. A. Trickett, J. T. D. Barmanbek, A. S. Alshammari, P. Yang and O. M. Yaghi, *J. Am. Chem. Soc.*, 2017, **139**, 356-362.
- 11 M. Y. Sun, S. Y. Yan, Y. J. Sun, X. H. Yang, Z. F. Guo, J. F. Du, D. S. Chen, P. Chen and H. Z. Xing, *Dalton Trans.*, 2018, **47**, 909-915.
- 12 L. Ye, Y. Gao, S. Y. Cao, H. Chen, Y. Yao, J. G. Hou and L. C. Sun, *Appl.*

- Catal.*, *B*, 2018, **227**, 54-60.
- 13 H. Zhao, X. S. Wang, J. F. Feng, Y. N. Chen, X. Yang, S. Y. Gao and R. Cao, *Catal. Sci. Technol.*, 2018, **8**, 1288-1295.
  - 14 Y. P. Wei, Y. Liu, F. Guo, X. Y. Dao and W. Y. Sun, *Dalton Trans.*, 2019, **48**, 8221-8226.
  - 15 M. Elcheikh Mahmoud, H. Audi, A. Assoud, T. H. Ghaddar and M. Hmadeh, *J. Am. Chem. Soc.*, 2019, **141**, 7115-7121.
  - 16 X. Y. Feng, Y. H. Pi, Y. Song, C. Brzezinski, Z. W. Xu, Z. Li and W. B. Lin, *J. Am. Chem. Soc.*, 2020, **142**, 690-695.
  - 17 S. Grimme, *J. Comput. Chem.*, 2006, **27**, 1787-1799.
  - 18 S. Grimme, J. Antony, S. Ehrlich and H. Krieg, *J. Chem. Phys.*, 2010, **132**, 154104.
  - 19 S. Grimme, S. Ehrlich and L. Goerigk, *J. Comput. Chem.*, 2011, **32**, 1456-1465.
  - 20 M. J. Frisch, G. W. Trucks, H. B. Schlegel, G. E. Scuseria, M. A. Robb, J. R. Cheeseman, G. Barone, V. Scalmani, G. A. Petersson, H. Nakatsuji, *Gaussian, Inc. Wallingford, CT*, 2016.
  - 21 A. V. Marenich, C. J. Cramer and D. G. Truhlar, *J. Phys. Chem. B.*, 2009, **113**, 6378-6396.
  - 22 D. Andrae, U. HauBermann, M. Dolg, H. Stoll and H. PreuB, *Theor. Chim. Acta.*, 1990, **77**, 123-141.
  - 23 Y. Zhao and D. G. Truhlar, *Theor. Chem. Acc.*, 2007, **120**, 215-241.
  - 24 C. P. Kelly, C. J. Cramer and D. G. Truhlar, *J. Phys. Chem. B.*, 2007, **111**, 408-422.
  - 25 G. J. Tawa, I .A. Topol, S. K. Burt, R. A. Caldwell and A. A. Rashin, *J. Phys. Chem. C.*, 1998, **109**, 4852-4863.
  - 26 T. Lu and F. Chen, *J. Comput. Chem.*, 2012, **33**, 580-592.
  - 27 C. Y. Legault, CYLview, 1.0b 2009Université de Sherbrooke, <http://www.cylview.org>, (accessed 20 October 2020).
